# Supplementary material for: Integrated Metabolomic and Transcriptomic Analysis of the Flavonoid Accumulation in the Leaves of Cyclocarya paliurus at Different Altitudes
Source: Front Plant Sci. 2022 Feb 8;12:794137. doi: 10.3389/fpls.2021.794137 (PMC8860981; doi:10.3389/fpls.2021.794137)
Supplement: Supplementary file 7 [file Table_4.xlsx]

## Sheet: Sheet1
Table S4. Liquid chromatography–mass spectrometry detection of metabolites in the leaves of Cyclocarya paliurus plants collected at low and high altitudes
Index	Compounds	Class	HD1	HD2	HD3	LD1	LD2	LD3	VIP	Fold_Change	LogFC
mws1082	β-Sitosterol		2950000	11800000	6940000	8720000	4730000	16100000	0.471059	1.36238	0.446128
pma0110	O-Sinapoyl quinic acid	Quinate and its derivatives	118000	559000	216000	207000	171000	151000	0.487594	0.592385	-0.755392
pma0134	D(-)-Threose	Carbohydrates	3650000	211000	4770000	2860000	3230000	2310000	0.598997	0.973236	-0.0391384
pma0149	Sinapoyl malate	Organic acids	305000	531000	487000	834000	211000	344000	0.13759	1.04989	0.0702335
pma0214	methylQuercetin O-hexoside	Flavonol	400000	1280000	117000	196000	69000	56000	1.46727	0.178631	-2.48495
pma0249	Selgin 5-O-hexoside	Flavone	80200	743000	356000	364000	504000	296000	0.39389	0.98711	-0.0187174
pma0253	O-methylChrysoeriol 5-O-hexoside	Flavone	1440000	24100000	5040000	247000	775000	1630000	1.83636	0.0867233	-3.52744
pma0461	14,15-Dehydrocrepenynic acid	Lipids_Fatty acids	3740000	4360000	3670000	6790000	3550000	2740000	0.0658512	1.1113	0.152248
pma0633	N-p-coumaroylspermine	Phenolamides	9	9	14700	9	9	9	1.55266	0.00183449	-9.09041
pma0702	N', N''-disinapoylspermidine	Phenolamides	7890000	11500000	5230000	8940000	5230000	3030000	0.637804	0.698619	-0.517422
pma0724	Naringenin C-hexoside	Flavone C-glycosides	2040000	557000	958000	168000	693000	316000	1.32689	0.331083	-1.59474
pma0760	Selgin O-malonylhexoside	Flavone	1110000	761000	326000	480000	363000	215000	0.941408	0.481566	-1.0542
pma0791	Naringenin O-malonylhexoside	Flavanone	50600	9	39000	22400	104000	208000	1.93669	3.73177	1.89986
pma0825	Chrysin O-malonylhexoside	Flavone	18000	21300	9	9930	159000	175000	2.16008	8.7494	3.12918
pma0948	Hydroxyphenethylamine	Others	5400000	221000	7440000	5300000	5280000	3340000	0.748226	1.06577	0.0918939
pma1108	Apigenin C-glucoside	Flavone C-glycosides	31400000	9000000	22000000	1060000	12000000	2930000	1.65256	0.25625	-1.96438
pma1116	Kaempferide	Flavonol	883000	988000	1550000	187000	359000	234000	1.75162	0.228004	-2.13287
pma1590	Peonidin O-hexoside	Anthocyanins	9	239000	248000	724000	250000	9	0.173442	1.99998	0.999987
pma1751	Nicotinic acid-hexoside	Nicotinic acid derivatives	31600000	18900000	31900000	8470000	24600000	21200000	0.762134	0.658617	-0.602489
pma2400	Dihydrojasmone	Others	295000	629000	420000	242000	302000	213000	0.934251	0.563244	-0.828168
pma2681	Xanthurenic acid	Organic acids	137000	155000	118000	60200	80100	104000	0.989283	0.595854	-0.74697
pma2987	Histidinol	Others	6400000	7100000	7650000	6180000	5880000	5830000	0.548015	0.845863	-0.241504
pma3101	Nicotinate ribonucleoside	Nicotinic acid derivatives	20600000	23000000	21400000	10000000	13700000	17700000	0.922723	0.636923	-0.650809
pma3606	9-Hydroxy-(10E,12Z,15Z)-octadecatrienoic acid	Lipids_Fatty acids	458000	588000	546000	678000	188000	188000	0.868226	0.66206	-0.594965
pma3649	5-Aminolevulinate	Organic acids	2110000	2990000	3950000	4450000	2170000	2920000	0.0827215	1.05414	0.0760715
pma3724	1-O-Feruloyl quinic acid	Quinate and its derivatives	4350000	1790000	3220000	4450000	4820000	8870000	1.02022	1.93803	0.954594
pma6199	Chrysin O-hexoside	Flavone	1260000	431000	719000	635000	1800000	2360000	0.868705	1.98963	0.992498
pma6270	sn-Glycero-3-phosphocholine	Cholines	803000	997000	646000	106000	158000	97400	2.02782	0.147751	-2.75876
pma6281	Methylglutaric acid	Organic acids	36100	47100	33700	45500	64100	67000	0.839368	1.51069	0.59521
pma6298	3-Hydroxypyridine	Others	484000	463000	633000	23300	25400	22300	2.59724	0.0449367	-4.47596
pma6372	Tricin O-vanilloylhexoside	Flavone	22000	37400	9	24000	17200	19000	1.41713	1.01331	0.019082
pma6373	3',4',5'-Dihydrotricetin O-hexosyl-O-hexoside	Flavone	2250000	5890000	5050000	1050000	691000	2520000	1.42749	0.323048	-1.63018
pma6389	Ayanin	Flavonol	640000	577000	715000	450000	392000	213000	1.07072	0.546066	-0.872852
pma6455	Ribulose-5-phosphate	Carbohydrates	286000	327000	343000	141000	269000	215000	0.869694	0.653766	-0.613154
pma6460	5-O-p-Coumaroylquinic acid	Quinate and its derivatives	8840000	1630000	7890000	6540000	10100000	10000000	0.768197	1.45098	0.537028
pma6496	Luteolin 6-C-glucoside	Flavone C-glycosides	3150000	785000	3150000	223000	1130000	495000	1.47671	0.260833	-1.9388
pma6516	C-hexosyl-apigenin O-hexosyl-O-hexoside	Flavone C-glycosides	304000	241000	335000	306000	303000	189000	0.266456	0.906818	-0.141115
pma6558	Velutin	Flavone	46700	2880000	460000	59200	10300	240000	1.56496	0.0913869	-3.45187
pma6561	Caffeic acid O-glucoside	Hydroxycinnamoyl derivatives	2720000	11800000	3680000	7910000	2690000	3440000	0.221703	0.771429	-0.374396
pma6576	Spinacetin	Flavone	19400	9340	12500	21100	15500	10300	0.250428	1.13725	0.185544
pma6599	6-Hydroxymethylherniarin	Hydroxycinnamoyl derivatives	2790000	11800000	6730000	3050000	1660000	1170000	1.42229	0.275797	-1.85832
pma6625	E-3,4,5'-Trihydroxy-3'-glucopyranosylstilbene	Others	101000	89900	59100	24000	59600	101000	0.646525	0.7384	-0.437526
pma6638	O-methylChrysoeriol 7-O-hexoside	Flavone	1550000	25100000	5360000	340000	780000	1740000	1.81171	0.0893471	-3.48444
pma6639	Isorhamnetin O-hexoside	Flavonol	983000	627000	420000	894000	569000	459000	0.0638682	0.946798	-0.0788714
pmb0064	DIMBOA glucoside	Others	22200	22900	52700	23200	38400	36200	0.112537	1	0
pmb0069	Benzamide	Others	3040000	477000	10400000	6150000	2750000	3400000	0.47746	0.883811	-0.17819
pmb0108	Feruloyl syringic acid	Hydroxycinnamoyl derivatives	770000	590000	498000	379000	854000	823000	0.103988	1.10657	0.14609
pmb0128	delta-Tridecalactone	Lipids_Fatty acids	171000	116000	297000	149000	133000	92500	0.673998	0.641267	-0.641003
pmb0142	Caffeic aldehyde	Hydroxycinnamoyl derivatives	141000	250000	198000	245000	242000	207000	0.441328	1.17827	0.236668
pmb0149	MAG (18:4) isomer1	Lipids_Glycerolipids	4700000	5290000	4220000	3410000	5140000	2990000	0.528159	0.812104	-0.300263
pmb0159	DGMG (18:2) isomer2	Lipids_Glycerolipids	1570000	2220000	2450000	2530000	3280000	1930000	0.456783	1.24038	0.310788
pmb0160	MAG (18:3) isomer5	Lipids_Glycerolipids	6390000	7640000	9850000	9550000	13000000	8350000	0.567162	1.29397	0.371804
pmb0161	DGMG (18:2) isomer1	Lipids_Glycerolipids	1090000	1590000	1380000	1520000	1000000	838000	0.454294	0.827094	-0.273877
pmb0163	DGMG (18:2) isomer3	Lipids_Glycerolipids	869000	1480000	1040000	1840000	1110000	771000	0.104481	1.09796	0.134831
pmb0164	MAG (18:2) isomer1	Lipids_Glycerolipids	1650000	1030000	1400000	279000	1380000	682000	0.987412	0.573775	-0.801444
pmb0165	LysoPC 16:1	Lipids_Glycerophospholipids	125000	137000	144000	76300	9	72800	2.00641	0.367264	-1.44511
pmb0168	PC 16:1/14:1	Lipids_Glycerophospholipids	11400	31000	37400	20700	11000	11600	0.793588	0.542607	-0.882022
pmb0197	N2-methylguanosine	Nucleotide and its derivates	177000	140000	184000	70600	135000	135000	0.787567	0.67984	-0.556732
pmb0235	O-Feruloyl coumarin	Coumarins	448000	1030000	228000	973000	449000	305000	0.111046	1.01231	0.0176504
pmb0247	p-Aminobenzoate	Benzoic acid derivatives	1620000	1850000	1060000	1560000	2160000	974000	0.0203853	1.0362	0.0513068
pmb0287	MAG (18:4) isomer2	Lipids_Glycerolipids	17200	19900	34000	11300	7040	12400	1.22422	0.432349	-1.20973
pmb0292	Cholesterol	Others	787000	862000	920000	1510000	1220000	762000	0.567774	1.35928	0.442847
pmb0296	MAG (18:1) isomer2	Lipids_Glycerolipids	440000	510000	892000	619000	381000	379000	0.511274	0.748643	-0.417651
pmb0302	2-Aminoethylphosphonate	Others	280000	394000	283000	920000	442000	293000	0.722444	1.72936	0.79024
pmb0312	5-methoxyindole-3-carbaldehyde	Indole derivatives	387000	316000	352000	200000	259000	308000	0.744735	0.727014	-0.459945
pmb0374	Aminopurine	Others	2240000	3650000	7970000	5650000	3690000	4180000	0.161844	0.975469	-0.0358321
pmb0382	O-Feruloyl 4-hydroxylcoumarin	Coumarins	9	9	2920000	2820000	1340000	1360000	3.44185	1.8904	0.918691
pmb0423	Hydroxy-methoxycinnamate	Hydroxycinnamoyl derivatives	2340000	3910000	2020000	1720000	2050000	2360000	0.548055	0.741233	-0.432
pmb0426	5-Methoxy-N,N-dimethyltryptamine	Tryptamine derivatives	972000	612000	748000	842000	631000	371000	0.512653	0.790738	-0.338729
pmb0449	2-Aminoadipic acid (L-Homoglutamic acid)	Amino acids	915000	666000	1460000	707000	598000	747000	0.665742	0.674778	-0.567515
pmb0464	Aspartic acid di-O-glucoside	Amino acid derivatives	149000	44200	85300	178000	140000	292000	1.15854	2.19031	1.13113
pmb0468	N-formylmethionine	Amino acid derivatives	1130000	149000	749000	59700	236000	91200	1.55064	0.190779	-2.39003
pmb0484	Choline	Cholines	3220000	2860000	4440000	1930000	3000000	2940000	0.619331	0.748099	-0.418699
pmb0490	N-p-Coumaroyl putrescine	Phenolamides	221000	231000	157000	143000	298000	164000	0.0952559	0.993432	-0.00950709
pmb0492	N',N",N"'-p-coumaroyl-cinnamoyl-caffeoyl spermidine	Phenolamides	442000	175000	800000	350000	180000	305000	0.562398	0.589273	-0.762992
pmb0493	N'-p-Coumaroyl agmatine	Phenolamides	518000	60700	315000	65700	220000	133000	0.645726	0.468502	-1.09387
pmb0501	Agmatine	Phenolamides	1340000	1190000	4000000	423000	1380000	2710000	0.578853	0.691118	-0.532996
pmb0503	N-(4'-O-glycosyl)-p-coumaroyl agmatine	Phenolamides	286000	176000	204000	135000	396000	257000	0.170774	1.18318	0.242673
pmb0505	N'-p-Coumaroyl putrescine	Phenolamides	913000	864000	593000	448000	1030000	531000	0.407548	0.847679	-0.238409
pmb0508	N-p-Coumaroyl agmatine	Phenolamides	197000	39000	121000	20600	138000	50300	0.734103	0.585154	-0.773112
pmb0514	Adenosine 3'-monophosphate	Nucleotide and its derivates	9570000	5400000	11400000	4910000	3440000	5250000	1.03058	0.515738	-0.955291
pmb0530	Nicotinic acid adenine dinucleotide	Nucleotide and its derivates	1320000	1360000	2160000	223000	1550000	1090000	0.952397	0.591529	-0.757479
pmb0542	Cyanidin 3-O-malonylhexoside	Anthocyanins	57600	9	39000	77100	39000	91200	1.83015	2.14576	1.10149
pmb0545	Rosinidin O-hexoside	Anthocyanins	228000	173000	200000	352000	56700	9	1.93291	0.680048	-0.556291
pmb0550	Cyanidin 3-O-glucoside (Kuromanin)	Anthocyanins	4930000	563000	21800000	2110000	1310000	4000000	0.553163	0.271865	-1.87904
pmb0563	Peonidin	Anthocyanins	147000	9	9	542000	817000	9	1.9083	9.24383	3.20849
pmb0565	Syringetin 3-O-hexoside	Flavonol	2340000	1590000	2170000	280000	538000	1450000	1.4263	0.371803	-1.42739
pmb0569	Syringetin 5-O-hexoside	Flavone	6430000	14400000	13600000	9970000	5170000	3960000	0.910369	0.554749	-0.850094
pmb0574	Luteolin O-hexoside O-feruloylpentoside	Flavone	24200	70700	98600	9	89300	98400	1.45827	0.970072	-0.0438357
pmb0578	Luteolin O-sinapoylhexoside	Flavone	421000	24900	152000	710000	27500	46100	0.172834	1.31059	0.390213
pmb0580	Chrysin 5-O-glucoside (Toringin)	Flavone	1210000	358000	563000	561000	1650000	2180000	0.91292	2.06053	1.04302
pmb0587	Chrysoeriol O-glucuronic acid-O-hexoside	Flavone	245000	365000	329000	597000	1310000	1830000	1.57594	3.97977	1.99268
pmb0595	Isorhamnetin 5-O-hexoside	Flavonol	837000	593000	513000	823000	605000	451000	0.0918332	0.967061	-0.0483208
pmb0600	Chrysoeriol 7-O-rutinoside	Flavone	9	106000	52000	9	9	9	3.04535	0.000170876	-12.5148
pmb0602	Syringetin 7-O-hexoside	Flavone	6690000	14700000	13800000	10800000	5190000	4200000	0.879938	0.573743	-0.801525
pmb0604	Kaempferol 3-O-glucoside (Astragalin)	Flavonol	1740000	2070000	2930000	4520000	10400000	21700000	1.67907	5.43323	2.44181
pmb0605	Apigenin 7-O-glucoside (Cosmosiin)	Flavone	2260000	1660000	1150000	1960000	890000	1220000	0.431997	0.802761	-0.316957
pmb0606	Chrysoeriol O-glucuronic acid	Flavone	107000	9	156000	44700	72200	9	0.277842	0.444506	-1.16973
pmb0618	8-C-hexosyl-hesperetin O-hexoside	Flavone C-glycosides	80700	100000	340000	2650000	652000	1450000	2.09436	9.12618	3.19001
pmb0628	Eriodictiol C-hexosyl-O-hexoside	Flavone C-glycosides	9	9	9	689000	9	9	1.91652	25519.2	14.6393
pmb0644	Luteolin C-hexoside	Flavone C-glycosides	3750000	999000	3200000	220000	1200000	529000	1.56678	0.245188	-2.02804
pmb0645	6-C-hexosyl-hesperetin O-hexoside	Flavone C-glycosides	835000	407000	316000	965000	899000	944000	1.05868	1.80231	0.849848
pmb0652	C-hexosyl-apigenin O-pentoside	Flavone C-glycosides	113000	9	300000	9	97900	35400	0.379716	0.322775	-1.6314
pmb0663	8-C-hexosyl-luteolin O-hexoside	Flavone C-glycosides	9	208000	9	158000	81300	9	1.39965	1.15042	0.202166
pmb0665	Luteolin 8-C-hexosyl-O-hexoside	Flavone C-glycosides	286000	514000	255000	94500	95100	52000	1.72089	0.229005	-2.12655
pmb0672	6-C-hexosyl-apigenin O-feruloylhexoside	Flavone C-glycosides	9	9	43200	58600	65100	98300	3.14918	5.13675	2.36086
pmb0686	Eriodictyol O-malonylhexoside	Flavanone	6810000	259000	233000	1300000	362000	276000	0.362969	0.265407	-1.91372
pmb0689	Chrysoeriol C-hexoside	Flavone C-glycosides	97500	212000	227000	72100	135000	128000	0.727905	0.624604	-0.678986
pmb0696	8-C-hexosyl chrysoeriol O-hexoside	Flavone C-glycosides	102000	138000	9	417000	229000	174000	2.12561	3.41654	1.77254
pmb0701	Chrysoeriol 8-C-hexoside	Flavone C-glycosides	806000	192000	1030000	29700	312000	73400	1.70009	0.204684	-2.28853
pmb0706	Quercetin 5-O-malonylhexosyl-hexoside	Flavonol	228000	107000	135000	441000	95800	116000	0.190489	1.38894	0.47398
pmb0709	Quercetin 7-O-malonylhexosyl-hexoside	Flavonol	81900	30500	9	42400	9	79600	0.0558995	1.0854	0.11823
pmb0711	Quercetin 7-O-rutinoside	Flavonol	125000	314000	164000	80400	21700	41400	1.66471	0.237977	-2.07111
pmb0723	Tricin 4'-O-(β-guaiacylglyceryl) ether O-hexoside	Flavonolignan	449000	543000	518000	564000	966000	776000	0.823031	1.52715	0.610844
pmb0724	Tricin O-rhamnoside	Flavone	2830000	3620000	5660000	80400	869000	547000	2.13064	0.123567	-3.01663
pmb0725	Tricin 7-O-feruloylhexoside	Flavone	270000	393000	215000	9	39800	55000	2.53562	0.107983	-3.21113
pmb0727	Tricin O-glycerol	Flavone	9	9	14500	9	9	26500	0.111856	1.82656	0.869129
pmb0738	Tricin O-sinapoylhexoside	Flavone	60700	680000	258000	9	21000	39300	2.58589	0.0603875	-4.04961
pmb0743	Tricin 7-O-β-guaiacylglycerol	Flavonolignan	8800	13500	13800	9	9	9	3.95855	0.000747922	-10.3848
pmb0745	Tricin 4'-O-syringyl alcohol	Flavonolignan	12700	18900	11300	9	9120	9780	1.72808	0.440769	-1.1819
pmb0746	Tricin 4'-O-β-guaiacylglycerol	Flavonolignan	352000	2910000	620000	66000	366000	717000	1.1839	0.295981	-1.75642
pmb0749	O-Feruloyl quinic acid	Quinate and its derivatives	481000	1480000	1100000	1300000	466000	855000	0.212261	0.856256	-0.223886
pmb0751	5-O-p-Coumaroyl shikimic acid	Quinate and its derivatives	916000	208000	654000	340000	1620000	1360000	0.729592	1.86727	0.900928
pmb0752	3-O-Feruloyl quinic acid	Quinate and its derivatives	4760000	8860000	14700000	11300000	3890000	6900000	0.364412	0.780014	-0.358428
pmb0764	4-Methyl-5-thiazoleethanol	Others	77900	129000	85600	115000	24100	36400	0.95597	0.6	-0.736966
pmb0766	Azoxystrobin acid	Others	1500000	1640000	1770000	1850000	1320000	1710000	0.0425487	0.99389	-0.00884188
pmb0767	D-erythro-Dihydrosphingosine	Others	50200	140000	181000	83200	16500	88800	0.922983	0.507812	-0.977632
pmb0769	N-hexosyl-p-coumaroyl serotonin	Tryptamine derivatives	294000	418000	238000	9	653000	619000	1.56608	1.33896	0.421109
pmb0770	N-Feruloyl serotonin	Tryptamine derivatives	1600000	1450000	997000	297000	1170000	1300000	0.756765	0.683716	-0.54853
pmb0772	N-Cinnamoyl serotonin	Tryptamine derivatives	13900	9	22800	17500	11200	14000	1.43376	1.1632	0.218102
pmb0774	N-hydroxy tryptamine	Tryptamine derivatives	55200000	6650000	33200000	2400000	10800000	4150000	1.569	0.182536	-2.45375
pmb0782	Piperidine	Alkaloids	1530000	1360000	1910000	2110000	1740000	1600000	0.358235	1.13542	0.183222
pmb0786	Glucosamine	Carbohydrates	10000000	12100000	14800000	9550000	7940000	5520000	0.906573	0.623577	-0.68136
pmb0789	Pyridoxine O-glucoside	Vitamins	3110000	2820000	3540000	5440000	5080000	3790000	0.864173	1.51109	0.595587
pmb0790	Pyridoxine di-O-hexoside	Vitamins	673000	84400	767000	152000	128000	162000	0.997911	0.28995	-1.78612
pmb0800	Niacinamide	Vitamins	1610000	2650000	3110000	7220000	2280000	2870000	0.656092	1.67843	0.747109
pmb0802	D-Pantothenic acid	Vitamins	6180000	1570000	8060000	6010000	2790000	2810000	0.232979	0.734345	-0.445469
pmb0803	Pyridoxine O-feruloyl hexoside	Vitamins	161000	293000	262000	98400	47500	60500	1.58382	0.288268	-1.79452
pmb0808	6,7-dihydroxycoumarin 6-O-quinic acid	Coumarins	9170000	8960000	11200000	9980000	13400000	11500000	0.477697	1.18923	0.250023
pmb0812	Imidazole-4-acetate	Indole derivatives	386000	361000	224000	140000	884000	237000	0.0304953	1.29866	0.377025
pmb0818	Methoxyindoleacetic acid	Indole derivatives	779000	564000	1500000	1250000	779000	699000	0.0194465	0.95955	-0.0595705
pmb0829	Phosphoric acid	Organic acids	19900000	36200000	19200000	15400000	21100000	19200000	0.542113	0.739708	-0.434973
pmb0837	Procyanidin A3	Proanthocyanidins	20400000	7140000	22400000	3940000	30700000	34600000	0.0959613	1.38646	0.47141
pmb0848	LysoPC 16:1 (2n isomer)	Lipids_Glycerophospholipids	1320000	1430000	3510000	5430000	1070000	1280000	0.0528964	1.24281	0.313607
pmb0852	LysoPC 18:2	Lipids_Glycerophospholipids	1810000	2200000	2920000	1640000	1230000	1350000	0.936319	0.608947	-0.715612
pmb0854	LysoPC 18:3	Lipids_Glycerophospholipids	8510000	13100000	15100000	5680000	6000000	6820000	1.12451	0.50395	-0.988648
pmb0855	LysoPC 16:0	Lipids_Glycerophospholipids	14000000	25900000	38900000	10100000	9530000	13100000	1.17813	0.415355	-1.26758
pmb0856	LysoPE 18:1 (2n isomer)	Lipids_Glycerophospholipids	1090000	3510000	4820000	1230000	725000	1050000	1.24973	0.319002	-1.64836
pmb0859	LysoPC 18:1 (2n isomer)	Lipids_Glycerophospholipids	95200	282000	447000	339000	81300	135000	0.504679	0.673744	-0.569727
pmb0863	LysoPC 16:2 (2n isomer)	Lipids_Glycerophospholipids	159000	151000	385000	667000	136000	148000	0.168475	1.36835	0.452432
pmb0864	LysoPE 14:0	Lipids_Glycerophospholipids	51400	36400	105000	19800	22000	16200	1.4463	0.30083	-1.73298
pmb0865	LysoPC 18:3 (2n isomer)	Lipids_Glycerophospholipids	229000	308000	827000	654000	293000	330000	0.0419794	0.936217	-0.0950851
pmb0866	LysoPC 14:0	Lipids_Glycerophospholipids	216000	146000	220000	125000	124000	98700	0.969152	0.597423	-0.743176
pmb0873	LysoPC 18:2 (2n isomer)	Lipids_Glycerophospholipids	239000	354000	642000	799000	197000	268000	0.121653	1.02348	0.0334854
pmb0874	LysoPE 18:2 (2n isomer)	Lipids_Glycerophospholipids	1220000	1910000	2950000	735000	577000	820000	1.37857	0.350658	-1.51186
pmb0876	LysoPE 16:0	Lipids_Glycerophospholipids	3880000	10800000	20100000	2630000	1560000	3010000	1.57217	0.207016	-2.27219
pmb0877	LysoPE 18:1	Lipids_Glycerophospholipids	43500	152000	223000	63300	28900	49300	1.14894	0.338112	-1.56443
pmb0880	LysoPE 18:0 (2n isomer)	Lipids_Glycerophospholipids	9	9	5440	9	9	9	1.44459	0.00494687	-7.65927
pmb0882	LysoPC 18:1	Lipids_Glycerophospholipids	773000	1960000	3020000	980000	383000	600000	1.255	0.341213	-1.55125
pmb0883	LysoPE 18:0	Lipids_Glycerophospholipids	15200	61200	123000	10800	5090	15600	1.6449	0.157924	-2.6627
pmb0885	4-oxo-9Z,11Z,13E,15E-octadecatetraenoic acid	Lipids_Fatty acids	227000	747000	352000	658000	307000	348000	0.0887806	0.990196	-0.0142139
pmb0889	Punicic acid	Lipids_Fatty acids	1240000	1750000	1340000	1580000	518000	370000	1.02737	0.569977	-0.811025
pmb0890	MAG (18:2)	Lipids_Glycerolipids	395000	324000	443000	374000	237000	244000	0.690174	0.7358	-0.442614
pmb0896	N'-Feruloyl putrescine	Phenolamides	176000	140000	529000	130000	33900	56700	1.47669	0.261065	-1.93752
pmb0907	N-Feruloyl putrescine	Phenolamides	214000	260000	822000	216000	61500	96200	1.37845	0.288349	-1.79411
pmb0962	Lysine butyrate	Amino acid derivatives	65000	102000	107000	11000	15600	7910	2.10533	0.125949	-2.98909
pmb0964	iP7G	Nucleotide and its derivates	2320000	1250000	997000	701000	2050000	1140000	0.310024	0.851982	-0.231106
pmb0981	Adenosine 5'-monophosphate	Nucleotide and its derivates	7720000	4030000	11900000	3900000	3440000	4470000	0.952181	0.499366	-1.00183
pmb0998	Guanosine 5'-monophosphate	Nucleotide and its derivates	148000	136000	237000	100000	102000	107000	0.936511	0.59309	-0.753677
pmb1096	Indole	Indole derivatives	1210000	868000	2030000	1550000	1040000	948000	0.213579	0.861246	-0.215502
pmb1178	O-Feruloyl 2-hydroxylcoumarin	Coumarins	4530000	5570000	6080000	2940000	1790000	2210000	1.32221	0.428925	-1.2212
pmb1207	O-Feruloyl 3-hydroxylcoumarin	Coumarins	9	57600	93700	9	48000	47500	0.148912	0.631218	-0.663789
pmb1240	Phellodensin F	Others	10500000	13900000	4760000	6330000	15800000	12500000	0.310297	1.18759	0.248032
pmb1283	L-Glutaminyl-L-valyl-L-valyl-L-cysteine	Amino acid derivatives	114000	67500	122000	81300	66600	90300	0.469567	0.784843	-0.349523
pmb1312	Tricin 4'-O-(β-guaiacylglyceryl) ether 7-O-hexoside	Flavonolignan	172000	280000	135000	19100	86000	114000	1.35024	0.373254	-1.42177
pmb1318	8-Methyl-2-oxo-4-phenyl-2H-chromen-7-yl 4-(hexyloxy)benzoate	Benzoic acid derivatives	12700000	22600000	5210000	2020000	17300000	7340000	0.683344	0.658109	-0.603601
pmb1452	N-Lauryldiethanolamine	Others	222000	293000	308000	373000	506000	310000	0.745586	1.44471	0.530784
pmb1466	Tricin 4'-O-syringic acid	Flavonolignan	35000	210000	82500	25500	9	22100	2.23452	0.145371	-2.78219
pmb1530	Phytocassane D	Terpenoids	318000	1080000	514000	849000	396000	518000	0.00622785	0.922071	-0.11705
pmb1562	MAG (18:4) isomer3	Lipids_Glycerolipids	66500	26800	40300	25800	48700	30500	0.375987	0.785928	-0.347531
pmb1574	Octadecadien-6-ynoic acid	Lipids_Fatty acids	396000	513000	404000	782000	495000	376000	0.400884	1.25895	0.33222
pmb1605	MAG (18:3) isomer3	Lipids_Glycerolipids	12200000	16200000	11900000	34100000	33400000	25700000	1.32244	2.31266	1.20955
pmb1626	MGMG (18:2) isomer1	Lipids_Glycerolipids	7850	32200	24100	51600	15400	13500	0.252652	1.25487	0.32754
pmb1650	Octadeca-11E,13E,15Z-trienoic acid	Lipids_Fatty acids	14700000	15000000	10000000	17900000	12400000	14600000	0.315892	1.13098	0.177576
pmb1652	Phthalic anhydride	Others	434000	405000	327000	544000	401000	433000	0.447342	1.18182	0.241008
pmb1656	MAG (18:3) isomer4	Lipids_Glycerolipids	256000	69800	141000	79400	73000	52600	1.01127	0.43916	-1.18718
pmb1754	O-Phosphocholine	Cholines	1630000	5010000	1520000	1480000	2540000	2720000	0.102684	0.82598	-0.275821
pmb1912	10-Formyl-THF	Others	5040000	2480000	9460000	3290000	3310000	3970000	0.537245	0.622497	-0.683861
pmb2211	Cocamidopropyl betaine	Others	1040000	962000	960000	1520000	1010000	1040000	0.444924	1.20527	0.269352
pmb2221	4-Hydroxysphinganine	Lipids_Fatty acids	1960000	6870000	3680000	2250000	812000	4300000	0.777147	0.588489	-0.764912
pmb2222	Phytocassane C	Terpenoids	65800	232000	143000	83200	28800	173000	0.692791	0.646552	-0.629162
pmb2228	LysoPC 19:0	Lipids_Glycerophospholipids	37600	97800	41000	93200	28200	21600	0.450989	0.810658	-0.302835
pmb2251	DGMG (18:1)	Lipids_Glycerolipids	8000000	9840000	10800000	10100000	13600000	9540000	0.37782	1.16061	0.214889
pmb2260	LysoPC 15:1	Lipids_Glycerophospholipids	79900	54500	99300	31600	21900	34600	1.38197	0.376979	-1.40744
pmb2319	LysoPC 15:0	Lipids_Glycerophospholipids	876000	1020000	1130000	609000	490000	589000	1.09695	0.557832	-0.842097
pmb2325	MAG (18:3) isomer2	Lipids_Glycerolipids	1680000	2080000	1680000	4380000	4810000	3410000	1.32168	2.31618	1.21175
pmb2363	MAG (18:1) isomer1	Lipids_Glycerolipids	427000	528000	776000	617000	395000	391000	0.421378	0.810514	-0.303091
pmb2383	MGMG (18:2) isomer2	Lipids_Glycerolipids	63800	150000	48700	103000	58500	44400	0.294422	0.784381	-0.350374
pmb2388	LysoPC 18:0 (2n isomer)	Lipids_Glycerophospholipids	338000	1010000	1450000	1180000	319000	489000	0.441591	0.710508	-0.493078
pmb2406	LysoPC 17:0	Lipids_Glycerophospholipids	477000	1730000	2440000	498000	300000	644000	1.22726	0.310308	-1.68823
pmb2444	MAG (18:3) isomer1	Lipids_Glycerolipids	16700000	12700000	22900000	15300000	16700000	18200000	0.0361131	0.959847	-0.0591236
pmb2467	α-Linolenic acid	Lipids_Fatty acids	2900000	3370000	4530000	2970000	3260000	2970000	0.385008	0.851852	-0.231326
pmb2497	4-Hydroxy-3-methoxymandelate	Organic acids	16300	9810	11300	8040	6950	25200	0.13065	1.07431	0.103413
pmb2507	2-Deoxyribose 1-phosphate	Carbohydrates	638000	1660000	880000	632000	1240000	1230000	0.019308	0.976086	-0.0349204
pmb2554	5-O-Feruloyl quinic acid glucoside	Quinate and its derivatives	51700	48800	77900	37000	123000	82600	0.357014	1.35987	0.443464
pmb2591	Acetyl tryptophan	Amino acid derivatives	352000	236000	517000	369000	213000	158000	0.688136	0.669683	-0.578449
pmb2601	7-hydroxycoumarin-beta-rhamnoside	Coumarins	1160000	451000	902000	1000000	2260000	1210000	0.886453	1.77875	0.830864
pmb2620	3,4-Dimethoxycinnamic acid	Hydroxycinnamoyl derivatives	7310	2420	3760	2540	5650	3510	0.154505	0.867309	-0.205382
pmb2640	Lauric acid (C12:0)	Lipids_Fatty acids	3970	4670	4360	4830	3920	4440	0.0498464	1.01462	0.0209329
pmb2643	Myristoleic acid (C14:1)	Lipids_Fatty acids	5130	10500	7060	12200	6730	7160	0.282828	1.14985	0.20144
pmb2648	Thiamine	Vitamins	18600	47600	21300	23800	57900	28400	0.392598	1.25829	0.33146
pmb2653	D(+)-Melezitose O-rhamnoside	Carbohydrates	14100	19000	23900	21000	24100	38100	0.702487	1.45965	0.545622
pmb2654	Anthranilate O-hexosyl-O-hexoside	Benzoic acid derivatives	235000	575000	439000	989000	686000	348000	0.705245	1.6197	0.695723
pmb2657	Argininosuccinate	Organic acids	173000	235000	425000	244000	456000	377000	0.518316	1.29292	0.37063
pmb2673	3-(6-Hydroxy-3,4-dioxo-1,5-cyclohexadien-1-yl)-L-alanine	Amino acid derivatives	9	3730	2610	21500	4710	4910	1.91441	4.90156	2.29324
pmb2684	Cyclic AMP	Nucleotide and its derivates	84500	101000	294000	735000	42200	113000	0.12285	1.85652	0.892599
pmb2723	4-hydroxycoumarin di-glucoside	Coumarins	223000	151000	312000	612000	283000	122000	0.336231	1.48251	0.568039
pmb2778	9,10-EODE	Lipids_Fatty acids	402000	524000	516000	459000	163000	114000	1.14288	0.510402	-0.970293
pmb2784	13-HOTrE	Lipids_Fatty acids	120000	152000	91600	80700	82500	54200	0.937611	0.59791	-0.742
pmb2786	9-HOTrE	Lipids_Fatty acids	44300	58800	56500	93300	57300	45400	0.352771	1.22807	0.296393
pmb2787	9-KODE	Lipids_Fatty acids	6020	7270	8100	14100	4600	6440	0.0986393	1.17532	0.233048
pmb2789	13-HpOTrE(r)	Lipids_Fatty acids	51900	41200	37300	57200	109000	42400	0.698021	1.59969	0.677795
pmb2791	9-HpOTrE	Lipids_Fatty acids	49600	43100	37300	68200	93400	35600	0.620614	1.51692	0.601148
pmb2792	13-HOTrE(r)	Lipids_Fatty acids	55500	40100	29600	52000	166000	65000	1.01843	2.26038	1.17657
pmb2795	4-Methoxycinnamic acid	Hydroxycinnamoyl derivatives	3830000	87900	636000	436000	2060000	1690000	0.611995	0.919212	-0.12153
pmb2799	12,13-EODE	Lipids_Fatty acids	4470	9350	9230	11500	9	4100	1.49232	0.67718	-0.562389
pmb2804	13-HPODE	Lipids_Fatty acids	74400	65200	87800	66000	29400	31300	1.04086	0.557168	-0.843816
pmb2819	O-Caffeoyl maltotriose	Hydroxycinnamoyl derivatives	929	9	9	9	9	1240	0.0680641	1.32841	0.409696
pmb2826	Citramalate	Organic acids	552000	512000	941000	519000	187000	321000	1.05418	0.512219	-0.965166
pmb2831	Protocatechuic acid O-glucoside	Catechin derivatives	6740000	1740000	6470000	4480000	4950000	3080000	0.0543162	0.836789	-0.257064
pmb2835	Syringaldehyde	Hydroxycinnamoyl derivatives	22700	96200	29100	55800	25700	25900	0.258006	0.725676	-0.462603
pmb2849	Camptothecin	Alkaloids	5560	16000	13000	2070	4000	13200	0.952667	0.557581	-0.842747
pmb2850	Tricin	Flavone	7570000	28200000	23500000	583000	7550000	8800000	1.50728	0.285693	-1.80746
pmb2855	L-Glutamine O-hexside	Amino acid derivatives	43500	92200	46100	66900	89800	71200	0.539751	1.25358	0.326049
pmb2857	L-Glutamic acid O-glucoside	Amino acid derivatives	28900	35600	50200	31000	64400	34500	0.187286	1.13252	0.179536
pmb2858	Maltotetraose	Carbohydrates	34300	43000	39100	10100	47800	71800	0.22829	1.11426	0.156087
pmb2867	Kynurenic acid O-hexside	Organic acids	17500000	26100000	17200000	2830000	10500000	9830000	1.36365	0.380921	-1.39244
pmb2871	2,5-dihydroxy benzoic acid O-hexside	Benzoic acid derivatives	29700000	49300000	38200000	35900000	19100000	29000000	0.665377	0.716724	-0.480511
pmb2873	3-(2-Naphthyl)-D-alanine	Amino acid derivatives	733000	1430000	611000	190000	122000	138000	1.91444	0.162221	-2.62397
pmb2893	N-p-Coumaroyl hydroxyagmatine	Phenolamides	32100	9440	21300	161000	21700	14400	0.756441	3.13654	1.64917
pmb2922	Uridine 5'-diphospho-D-glucose	Nucleotide and its derivates	4800000	3650000	4700000	916000	3430000	3310000	0.962998	0.582205	-0.7804
pmb2928	Gallic acid O-Hexoside	Benzoic acid derivatives	11200000	6090000	14200000	4120000	7590000	8980000	0.680299	0.657034	-0.60596
pmb2933	Caftaric acid	Hydroxycinnamoyl derivatives	3120000	4990000	19900000	8480000	4260000	5440000	0.204873	0.649054	-0.62359
pmb2936	Disinapoyl hexoside	Hydroxycinnamoyl derivatives	235000	110000	350000	19200	384000	352000	0.423832	1.08662	0.119846
pmb2938	4-O-Caffeoyl quinic acid (criptochlorogenic acid)	Quinate and its derivatives	825000	339000	739000	462000	879000	612000	0.109492	1.02627	0.0374164
pmb2940	1-O-beta-D-Glucopyranosyl sinapate	Hydroxycinnamoyl derivatives	1090000	154000	2460000	728000	1130000	608000	0.0717176	0.665767	-0.586911
pmb2947	Catechin-catechin-catechin	Catechin derivatives	1660000	150000	621000	117000	1130000	1770000	0.136743	1.24105	0.311565
pmb2957	Cyanidin O-syringic acid	Anthocyanins	69100	46900	184000	39100	52000	70400	0.70272	0.538333	-0.893428
pmb2959	Cyanidin O-acetylhexoside	Anthocyanins	12600	5220	5030	33500	4920	4180	0.29744	1.86433	0.898659
pmb2961	Peonidin O-malonylhexoside	Anthocyanins	1050000	2180000	2520000	522000	582000	950000	1.35014	0.357217	-1.48513
pmb2979	Hesperetin O-malonylhexoside	Flavanone	255000	184000	21400	169000	109000	518000	0.793475	1.72893	0.789881
pmb2984	Acetyl-eriodictyol O-hexoside	Flavone	13000	9	8710	9	60900	22100	0.446694	3.82195	1.93431
pmb2986	Chrysoeriol O-hexosyl-O-malonylhexoside	Flavone	30800	23800	38400	36300	34000	30300	0.250876	1.08172	0.113328
pmb2987	Acacetin O-acetyl hexoside	Flavone	389000	509000	393000	724000	284000	356000	0.0380806	1.05655	0.0793546
pmb2988	Luteolin O-hexosyl-O-gluconic acid	Flavone	57400	71300	111000	494000	92600	93400	0.935679	2.83688	1.5043
pmb2997	Chrysoeriol O-hexosyl-O-hexosyl-O-Glucuronic acid	Flavone	51700	11600	27400	56100	49100	63600	1.07293	1.86108	0.89614
pmb2999	Chrysoeriol 5-O-hexoside	Flavone	3470000	1280000	1400000	6070000	4720000	8960000	1.52623	3.21138	1.68319
pmb3000	Chrysoeriol O-acetylhexoside	Flavone	81500	64100	9	76300	41800	79100	1.64066	1.35431	0.43756
pmb3005	Chrysoeriol O-rhamnosyl-O-glucuronic acid	Flavone	16200	11900	13400	9	20500	19900	1.36833	0.973711	-0.0384347
pmb3012	Chrysoeriol 7-O-hexoside	Flavone	248000	250000	201000	480000	203000	254000	0.444213	1.34049	0.422757
pmb3013	Isorhamnetin O-acetyl-hexoside	Flavonol	35100	39600	11300	23800	13800	8300	0.800454	0.533721	-0.905843
pmb3014	Luteolin O-eudesmic acid-O-hexoside	Flavone	25200	7690	20700	25400	27000	13300	0.424542	1.22597	0.29393
pmb3023	Eriodictyol C-hexoside	Flavone C-glycosides	2490000	492000	506000	401000	592000	736000	0.568664	0.4957	-1.01246
pmb3026	Quercetin O-acetylhexoside	Flavonol	3650000	715000	260000	1150000	969000	957000	0.178837	0.665081	-0.588398
pmb3032	Tricin O-malonyl rhamnoside	Flavone	2840	4840	12300	9	9	9	3.72902	0.00135135	-9.53138
pmb3041	Tricin O-saccharic acid	Flavone	3600000	3340000	1430000	3760000	2280000	1600000	0.126184	0.912784	-0.131655
pmb3042	Tricin 5-O-hexoside	Flavone	85900	126000	251000	103000	128000	152000	0.18264	0.827393	-0.273356
pmb3045	Tricin O-glucuronic acid	Flavone	28400	40800	19100	24300	9	16800	1.75742	0.465561	-1.10296
pmb3046	Tricin 7-O-hexoside	Flavone	863000	317000	589000	480000	399000	572000	0.23885	0.820237	-0.285887
pmb3047	Tricin 4'-O-(syringyl alcohol) ether 5-O-hexoside	Flavonolignan	90100	102000	37400	16900	34400	30100	1.31019	0.354684	-1.49539
pmb3055	p-Coumaroyl quinic acid O-glucuronic acid	Quinate and its derivatives	1730000	1440000	1830000	8460000	5920000	4850000	1.67225	3.846	1.94336
pmb3056	Homovanilloyl quinic acid	Quinate and its derivatives	3190000	6040000	5910000	2870000	7710000	4130000	0.129152	0.971598	-0.041568
pmb3058	Quinic acid O-glucuronic acid	Quinate and its derivatives	38900000	35100000	56700000	36500000	51600000	42900000	0.0346966	1.0023	0.00330767
pmb3059	Quinic acid O-di-glucuronic acid	Quinate and its derivatives	80900	21100	109000	9	184000	97100	1.32539	1.33227	0.413887
pmb3061	5-O-p-coumaroyl quinic acid O-hexoside	Quinate and its derivatives	96500	372000	258000	1830000	104000	89800	0.208226	2.78568	1.47803
pmb3062	Eudesmoyl quinic acid	Quinate and its derivatives	392000	1130000	882000	1020000	459000	632000	0.152482	0.87812	-0.18751
pmb3064	3-O-p-coumaroyl quinic acid O-hexoside	Quinate and its derivatives	37200	78900	36800	90500	62700	41200	0.446575	1.27142	0.34644
pmb3068	1-O-p-Coumaroyl quinic acid	Quinate and its derivatives	839000	3240000	1780000	2700000	754000	596000	0.595585	0.691244	-0.532733
pmb3073	O-p-Coumaroyl quinic acid O-rutinoside derivative	Quinate and its derivatives	800000	589000	955000	628000	1340000	1270000	0.534651	1.3814	0.46613
pmb3074	3-O-p-Coumaroyl quinic acid	Quinate and its derivatives	7010000	2330000	5990000	9860000	7130000	10200000	0.990087	1.77365	0.826718
pmb3075	3-O-p-Coumaroyl shikimic acid	Quinate and its derivatives	36800	9540	19300	16300	69800	61700	0.957815	2.25168	1.171
pmb3079	N-Acetylglucosamine 1-phosphate	Others	132000	139000	311000	303000	238000	288000	0.751662	1.4244	0.510353
pmb3081	Glucarate O-Phosphoric acid	Carbohydrates	8940000	11700000	9270000	1260000	6410000	13000000	0.872679	0.691073	-0.53309
pmb3088	Trehalose 6-phosphate	Carbohydrates	107000	147000	127000	115000	110000	102000	0.435336	0.858268	-0.2205
pmb3093	6,7-dihydroxycoumarin 7-O-quinic acid	Coumarins	19300000	37100000	26600000	21200000	23300000	21400000	0.442609	0.793976	-0.332833
pmb3094	Esculetin O-quinacyl esculetin O-quinic acid	Coumarins	2110000	6290000	3340000	3160000	2630000	3130000	0.320642	0.759796	-0.396317
pmb3099	Diethyl phosphate	Organic acids	671000	1370000	688000	866000	681000	656000	0.333696	0.807255	-0.308903
pmb3101	2-Isopropylmalate	Organic acids	1250000	365000	1320000	875000	351000	356000	0.773531	0.539012	-0.891611
pmb3107	Syringic acid O-glucoside	Benzoic acid derivatives	941000	1640000	497000	1240000	415000	453000	0.568568	0.68486	-0.546118
pmb3110	Vanillic acid	Hydroxycinnamoyl derivatives	1120000	2210000	2800000	3230000	3250000	1580000	0.48501	1.31485	0.394893
pmb3114	Epicatechin-epiafzelechin	Catechin derivatives	128000	18400	55900	18100	35900	37800	0.714813	0.453782	-1.13993
pmb3264	Glutathione oxidized	Amino acid derivatives	60600	34600	117000	10400	67600	100000	0.484964	0.838831	-0.253547
pmb3317	Quinacyl syringic acid	Quinate and its derivatives	2030000	1410000	3330000	643000	5880000	3440000	0.126538	1.47164	0.557424
pmb3894	Di-O-methylquercetin	Flavonol	194000	255000	221000	386000	81000	66600	0.729404	0.796418	-0.328402
pmb4777	4-Hydroxy-7-methoxycoumarin-beta-rhamnoside	Coumarins	1490000	1220000	1790000	528000	1130000	816000	1.0456	0.549778	-0.86308
pmc0066	2'-Deoxyinosine-5'-monophosphate	Nucleotide and its derivates	3730000	10000000	3270000	6460000	14800000	12100000	1.03587	1.96235	0.972585
pmc0274	6-Methylmercaptopurine	Nucleotide and its derivates	8960000	6630000	10900000	10300000	8340000	9840000	0.229355	1.07512	0.104501
pmc0281	Adenosine O-ribose	Nucleotide and its derivates	3900000	3380000	10600000	2210000	5480000	4540000	0.470128	0.684004	-0.547922
pmc0304	Succinyladenosine	Nucleotide and its derivates	2760000	3340000	3990000	1710000	2010000	1620000	1.13096	0.529237	-0.918015
pmc0682	4-Aminoindole	Indole derivatives	949000	9	928000	207000	308000	381000	1.38332	0.477355	-1.06686
pmc0960	LysoPC 20:4	Lipids_Glycerophospholipids	964000	2370000	2350000	4010000	675000	1090000	0.263761	1.01601	0.0229144
pmc1990	4'-Hydroxy-5,7-dimethoxyflavanone	Flavanone	15700	13800	19600	24800	14500	23300	0.496613	1.27495	0.35044
pmd0017	Spermine	Phenolamides	35600000	29100000	30800000	20900000	26100000	28200000	0.630568	0.787435	-0.344768
pmd0023	Adenosine	Nucleotide and its derivates	618000	1550000	2930000	3080000	1530000	1960000	0.568475	1.28874	0.365962
pmd0130	LysoPC 14:0 (2n isomer)	Lipids_Glycerophospholipids	428000	333000	499000	284000	293000	223000	0.905669	0.634921	-0.655352
pmd0132	LysoPC 16:0 (2n isomer)	Lipids_Glycerophospholipids	13300000	24200000	41000000	9760000	9420000	12100000	1.1825	0.398471	-1.32745
pmd0136	LysoPC 18:0	Lipids_Glycerophospholipids	7540000	33600000	78200000	12700000	5600000	18500000	0.999082	0.308363	-1.6973
pmd0144	LysoPC 20:1 (2n isomer)	Lipids_Glycerophospholipids	114000	365000	609000	348000	43700	159000	0.873471	0.506158	-0.98234
pmd0145	LysoPC 20:1	Lipids_Glycerophospholipids	98400	442000	673000	398000	112000	188000	0.512109	0.575243	-0.797756
pmd0158	LysoPE 14:0 (2n isomer)	Lipids_Glycerophospholipids	288	558	1190	650	134	310	0.81697	0.537328	-0.896125
pmd0160	LysoPE 16:0 (2n isomer)	Lipids_Glycerophospholipids	2420000	7670000	15900000	1610000	946000	1460000	1.70651	0.154521	-2.69413
pme0003	L-Homocitrulline	Amino acids	21000	14200	22600	11400	27200	22900	0.0320505	1.06401	0.0895169
pme0005	Purine	Nucleotide and its derivates	2490000	84600	3110000	1990000	2410000	1530000	0.754811	1.04317	0.0609733
pme0006	L-Proline	Amino acids	188000	80500	184000	213000	128000	253000	0.514851	1.31271	0.392545
pme0007	L-Citrulline	Amino acids	68600	18500	125000	107000	37400	28000	0.144863	0.812824	-0.298985
pme0009	L-Serine	Amino acids	94400	61200	83100	230000	320000	372000	1.68289	3.86259	1.94957
pme0011	L-Aspartic acid	Amino acids	844000	1640000	1520000	1720000	775000	1250000	0.143569	0.935315	-0.0964763
pme0013	L-Glutamic acid	Amino acids	5280000	3700000	5500000	5310000	6450000	6890000	0.615894	1.28798	0.365114
pme0018	L-Leucine	Amino acids	30000	39900	25500	71700	43200	34500	0.762733	1.56604	0.647119
pme0020	L-Phenylalanine	Amino acids	3360000	2340000	3900000	4630000	3760000	4940000	0.728317	1.38854	0.47357
pme0022	L-Threonine	Amino acids	167000	146000	197000	301000	201000	255000	0.825207	1.48431	0.569796
pme0026	L-(+)-Lysine	Amino acids	4090000	6480000	6850000	25200000	7320000	7920000	0.976827	2.32147	1.21504
pme0031	Thymine	Nucleotide and its derivates	56900	51500	40800	61400	51600	30000	0.163403	0.958445	-0.0612324
pme0032	Hypoxanthine	Nucleotide and its derivates	42700	53200	9510	6870	6310	6050	1.60778	0.182431	-2.45458
pme0036	L-Histidine	Amino acids	7570	6170	19800	88200	11200	15600	1.05138	3.42874	1.77768
pme0038	Cytosine	Nucleotide and its derivates	1500000	1720000	1770000	1180000	1320000	1770000	0.445117	0.855711	-0.224804
pme0039	L-Valine	Amino acids	24700000	18100000	25600000	28100000	27200000	27800000	0.554387	1.21491	0.280852
pme0042	L-(+)-Arginine	Amino acids	10500	9	148000	1780000	9	6660	0.334355	11.2717	3.49464
pme0050	L-Tryptophan	Amino acids	579000	568000	1300000	1470000	733000	698000	0.321463	1.18553	0.245536
pme0056	2,3-dimethylsuccinic acid	Amino acid derivatives	186000	112000	403000	227000	207000	176000	0.00878925	0.870185	-0.200605
pme0058	Cucurbitacin E	Terpenoids	4510	1940	9	2460	3350	1200	1.15385	1.08531	0.118104
pme0066	Guanidineacetic acid	Amino acid derivatives	1560	2530	1710	6130	3190	4310	1.26459	2.35	1.23266
pme0075	N-Acetyl-L-glutamic acid	Amino acid derivatives	529000	453000	469000	434000	463000	673000	0.167956	1.08201	0.113717
pme0088	Luteolin	Flavone	176000	85700	183000	75900	165000	132000	0.303624	0.838543	-0.254044
pme0108	5-Methylcytosine	Nucleotide and its derivates	51700	37500	71000	13600	34800	35300	1.0326	0.522472	-0.936575
pme0109	(-)-3-(3,4-Dihydroxyphenyl)-2-methylalanine	Amino acid derivatives	130000	317000	222000	1160000	313000	274000	1.02329	2.61136	1.3848
pme0113	γ-Glu-Cys	Amino acid derivatives	19000	16100	46400	15900	9	9	2.93879	0.195313	-2.35614
pme0118	Pyrrole-2-carboxylic acid	Amino acid derivatives	26200	57800	101000	129000	46300	60700	0.418863	1.27568	0.351262
pme0120	5-Aminovaleric acid	Amino acid derivatives	53400	132000	191000	172000	115000	172000	0.493031	1.21945	0.286228
pme0122	N6-Acetyl-L-lysine	Amino acid derivatives	209000	311000	419000	115000	211000	128000	1.12285	0.483493	-1.04843
pme0128	D-Alanyl-D-Alanine	Amino acid derivatives	5860	5830	4070	6100	5500	2720	0.273091	0.908629	-0.138236
pme0130	3-Methylxanthine	Nucleotide and its derivates	116000	228000	65200	132000	98300	76300	0.303244	0.749267	-0.416448
pme0133	Asp-phe	Amino acid derivatives	405000	314000	805000	1030000	111000	135000	0.723212	0.83727	-0.256235
pme0137	Nα-Acetyl-L-glutamine	Amino acid derivatives	2340000	1900000	1480000	1110000	2000000	1200000	0.604306	0.753497	-0.408327
pme0151	Dihydrouracil	Nucleotide and its derivates	23300	39800	48400	53600	28400	34900	0.110095	1.04843	0.0682312
pme0152	5,6-Dihydro-5-methyluracil	Nucleotide and its derivates	61900	9	93700	58500	9	9	1.53078	0.376058	-1.41097
pme0161	L-Homoserine	Amino acids	5320	5900	4490	7290	13200	14600	1.19744	2.23361	1.15938
pme0163	β-Nicotinamide mononucleotide	Nucleotide and its derivates	5450000	13900000	6230000	11600000	4390000	7650000	0.103379	0.924159	-0.113786
pme0164	N-γ-Acetyl-N-2-Formyl-5-methoxykynurenamine	Amino acid derivatives	72000	143000	37100	52300	52000	36700	0.686277	0.559302	-0.838301
pme0165	1-Methylxanthine	Nucleotide and its derivates	99800	88200	36000	62000	57200	108000	0.107765	1.01429	0.0204641
pme0174	N-Propionylglycine	Amino acid derivatives	93200	93200	112000	145000	84100	97400	0.166007	1.09417	0.129835
pme0176	Phenylacetyl-L-glutamine	Amino acid derivatives	30300	6150	41800	17600	17700	11400	0.347058	0.596805	-0.744668
pme0180	1-Methylhistidine	Amino acid derivatives	8430	3980	7720	6190	6390	9	1.46715	0.625385	-0.677183
pme0183	2-Hydroxy-6-aminopurine	Nucleotide and its derivates	756000	3270000	1440000	846000	559000	701000	1.07421	0.385291	-1.37598
pme0190	N-Glycyl-L-leucine	Amino acid derivatives	13700	14700	17800	27700	15700	19200	0.613003	1.35498	0.43827
pme0196	Kaempferol	Flavonol	704000	26000	102000	359000	201000	157000	0.617915	0.861779	-0.21461
pme0197	Quercetin 3-O-rutinoside (Rutin)	Flavonol	840000	2430000	873000	581000	155000	232000	1.62531	0.233647	-2.0976
pme0199	Quercetin	Flavonol	8260000	963000	2360000	3460000	8720000	5430000	0.860119	1.52033	0.604386
pme0205	Catechin	Catechin derivatives	3810000	1810000	2700000	778000	2460000	2020000	0.782555	0.631971	-0.662069
pme0207	3-Hydroxybutyrate	Organic acids	434000	383000	459000	241000	280000	388000	0.771497	0.712382	-0.489276
pme0208	Amentoflavone	Flavone	114000	112000	165000	49600	200000	94700	0.424242	0.880563	-0.183502
pme0226	L-Asparagine	Amino acids	15500	17600	18200	62700	16900	17500	0.659173	1.89279	0.920512
pme0233	Kynurenic acid	Organic acids	20100000	19700000	15600000	35800000	49300000	31000000	1.20565	2.09567	1.06741
pme0237	Ethyl 3,4-Dihydroxybenzoate (Ethyl protocatechuate)	Organic acids	79600	67700	59900	51700	90200	59100	0.127836	0.970077	-0.0438285
pme0240	Benzoic acid	Benzoic acid derivatives	255000	425000	393000	427000	774000	799000	1.006	1.86393	0.89835
pme0243	Glutaric acid	Organic acids	896000	312000	1840000	327000	380000	583000	0.857694	0.423228	-1.24049
pme0245	Adipic acid	Organic acids	136000	105000	304000	155000	118000	81900	0.579219	0.651193	-0.618844
pme0247	trans-4-Hydroxy-L-proline	Amino acid derivatives	15200	10300	12900	9390	28300	27600	0.67862	1.70026	0.765756
pme0249	Azelaic acid	Organic acids	69700	62600	74000	96500	73100	47000	0.0197153	1.04993	0.0702894
pme0250	Azelaic Acid	Organic acids	1150000	1400000	1520000	1780000	1230000	1170000	0.0407063	1.02703	0.0384741
pme0252	N-Acetyl-l-leucine	Amino acid derivatives	85800	111000	286000	361000	343000	189000	1.00747	1.84963	0.887234
pme0256	Xanthine	Nucleotide and its derivates	234000	350000	242000	45300	141000	261000	1.05337	0.541525	-0.884899
pme0257	Uracil	Nucleotide and its derivates	196000	246000	193000	176000	226000	228000	0.0266186	0.992126	-0.0114048
pme0264	Thymidine	Nucleotide and its derivates	9	9	9	9	9	5520	1.44775	205.111	7.68026
pme0266	Sebacate	Organic acids	2500	9	1920	3780	2550	2050	1.46999	1.89207	0.919969
pme0267	2-Methylsuccinic acid	Organic acids	5840000	3810000	7620000	1390000	1880000	2300000	1.49009	0.322525	-1.63252
pme0269	Dodecanedioic aicd	Organic acids	5640	4360	5110	5660	4580	3080	0.346938	0.881535	-0.18191
pme0274	6-Aminocaproic acid	Organic acids	6330000	6100000	8600000	10300000	7290000	6820000	0.353302	1.16072	0.215023
pme0275	4-Oxopentanoate	Organic acids	14500	18700	18800	12100	9850	16400	0.689552	0.7375	-0.439285
pme0279	2,6-Diaminooimelic acid	Amino acid derivatives	356000	262000	264000	55200	122000	130000	1.46654	0.348299	-1.5216
pme0281	Terephthalic acid	Organic acids	2270000	2940000	2330000	2600000	1500000	1680000	0.619301	0.766578	-0.383495
pme0282	Phthalic acid	Organic acids	207000	268000	204000	218000	101000	130000	0.827691	0.661267	-0.596696
pme0284	4-Guanidinobutyric acid	Organic acids	37200	9	33000	25300	18100	47500	1.51385	1.29471	0.372624
pme0286	2-Hydroxyisocaproic acid	Organic acids	26100	24500	157000	46800	81900	88900	0.518539	1.04817	0.0678721
pme0289	4-Ethylbenzoic acid	Organic acids	12200	20700	12200	18900	14300	18100	0.351432	1.13747	0.185831
pme0292	(3,4-Dimethoxyphenyl) acetic acid	Organic acids	74500	49800	118000	84900	79300	66400	0.0139902	0.951713	-0.0714019
pme0299	Cinnamic acid	Hydroxycinnamoyl derivatives	125000	32100	222000	119000	800000	453000	1.32891	3.6191	1.85563
pme0303	Caffeic acid	Hydroxycinnamoyl derivatives	2940000	892000	1260000	1140000	4800000	3640000	0.781345	1.88138	0.911793
pme0305	Ferulic acid	Hydroxycinnamoyl derivatives	7140000	6640000	14600000	7240000	18000000	18800000	0.654264	1.5518	0.63394
pme0307	Resveratrol	Hydroxycinnamoyl derivatives	93200	9	11200	7750	31700	36300	1.36399	0.725512	-0.462928
pme0309	Methyl gallate	Benzoic acid derivatives	48400	36500	45500	26900	26800	18000	1.08562	0.549847	-0.862899
pme0321	Kaempferol 7-O-rhamnoside	Flavonol	224000	614000	368000	748000	567000	205000	0.266976	1.26036	0.333841
pme0324	Chrysin	Flavone	39800	29100	33100	49200	94600	76100	1.18448	2.15588	1.10828
pme0330	Naringenin 7-O-neohesperidoside (Naringin)	Flavanone	43500	103000	25500	9	9	9	4.32319	0.000156977	-12.6372
pme0355	Daidzein	Isoflavone	45400	48500	32300	60600	45000	35900	0.246579	1.12124	0.16509
pme0359	Apigenin 5-O-glucoside	Flavone	1540000	551000	1090000	9	582000	194000	2.33245	0.243951	-2.03534
pme0361	Quercetin 3-alpha-L-arabinofuranoside (Avicularin)	Flavonol	4970000	9870000	7470000	3170000	11200000	14000000	0.148742	1.27163	0.346676
pme0363	Chrysoeriol	Flavone	4650000	7980000	14000000	1610000	4340000	1800000	1.48382	0.291025	-1.78078
pme0368	Apigenin 7-rutinoside (Isorhoifolin)	Flavone	9	178000	593000	9	175000	9	1.70801	0.226999	-2.13924
pme0369	Kaempferol 3-O-rutinoside (Nicotiflorin)	Flavonol	292000	1020000	231000	131000	80000	72500	1.65434	0.183733	-2.44432
pme0371	Naringenin 7-O-glucoside (Prunin)	Flavanone	6100000	2650000	3700000	4910000	3930000	6660000	0.476276	1.24498	0.316122
pme0374	Isovitexin	Flavone C-glycosides	174000	221000	110000	19000	39700	9	2.49019	0.116255	-3.10463
pme0376	Naringenin	Flavanone	7430000	1770000	7910000	6530000	7530000	8030000	0.631636	1.29106	0.368554
pme0379	Apigenin	Flavone	907000	787000	904000	213000	1360000	740000	0.506763	0.8903	-0.167636
pme0387	Homovanillic acid	Hydroxycinnamoyl derivatives	11400	7320	5150	16700	14800	7210	0.7627	1.6217	0.697508
pme0390	4-Methylumbelliferone	Hydroxycinnamoyl derivatives	83800	113000	113000	7920	195000	133000	0.562366	1.08431	0.116781
pme0397	Shikimic acid	Organic acids	859000	395000	1980000	267000	555000	485000	0.976375	0.404143	-1.30706
pme0398	Chlorogenic acid (3-O-Caffeoylquinic acid)	Quinate and its derivatives	1910000	1590000	1890000	2030000	2110000	2080000	0.496727	1.15399	0.206629
pme0408	Syringic acid	Hydroxycinnamoyl derivatives	492000	1790000	1120000	1360000	786000	663000	0.173308	0.825691	-0.276327
pme0413	Vanillin	Benzoic acid derivatives	1670000	4580000	1390000	2420000	2150000	1510000	0.166455	0.795812	-0.329501
pme0418	3-(4-Hydroxyphenyl)propionic acid	Hydroxycinnamoyl derivatives	469000	129000	205000	115000	898000	488000	0.560865	1.86924	0.902452
pme0422	3-Hydroxy-4-methoxycinnamic acid	Hydroxycinnamoyl derivatives	6900000	6870000	15100000	7470000	18200000	18900000	0.660338	1.54382	0.626502
pme0424	trans-cinnamaldehyde	Hydroxycinnamoyl derivatives	98400	45000	71900	22300	94400	142000	0.029036	1.20158	0.264932
pme0428	3,4,5-Trimethoxycinnamic acid	Hydroxycinnamoyl derivatives	2630	9	8370	9	5950	2650	0.0705252	0.781997	-0.354766
pme0431	Procyanidin A1	Proanthocyanidins	9	415000	899000	209000	1170000	2200000	2.01943	2.72373	1.44558
pme0434	Procyanidin B2	Proanthocyanidins	26700000	6680000	14800000	3640000	22600000	25600000	0.0921826	1.07597	0.105631
pme0436	Procyanidin B3	Proanthocyanidins	30900000	7130000	16000000	4020000	23500000	26500000	0.139356	0.999815	-0.000267042
pme0450	L-Epicatechin	Catechin derivatives	1830000	2030000	1750000	7740000	1050000	1600000	0.308126	1.85205	0.889123
pme0486	Methylmalonic acid	Organic acids	8240000	4780000	11400000	4980000	5790000	7100000	0.49706	0.731777	-0.450524
pme0496	Nicotinic acid	Nicotinic acid derivatives	82000	42900	79400	41600	102000	104000	0.258886	1.21194	0.277322
pme0499	D-Sorbitol	Alcohols and polyols	191000	333000	278000	103000	140000	158000	1.12943	0.5	-1
pme0500	D(+)-Melezitose	Carbohydrates	340000	289000	212000	74200	209000	364000	0.623645	0.76956	-0.377894
pme0513	Xylitol	Alcohols and polyols	48200	36800	109000	28300	51100	33600	0.729356	0.582474	-0.779734
pme0516	Inositol	Others	14000000	25700000	16100000	15400000	18700000	24700000	0.148881	1.05376	0.075551
pme0519	D-(+)-Sucrose	Carbohydrates	31400000	30700000	23400000	27900000	37000000	39400000	0.493919	1.21988	0.286743
pme0534	Gluconic acid	Carbohydrates	4490000	5110000	3870000	3070000	3510000	3170000	0.77855	0.723831	-0.466276
pme0543	Indole-5-carboxylic acid	Indole derivatives	45500	71800	94500	111000	120000	90400	0.834761	1.51747	0.601667
pme1001	L-Tyramine	Amino acids	5580	9	7880	5310	6910	9	0.0382753	0.907937	-0.139336
pme1014	Menaquinone (K2)	Vitamins	580000	538000	625000	729000	648000	293000	0.220504	0.958118	-0.0617245
pme1021	D-(+)-Glucono-1,5-lactone	Carbohydrates	186000	192000	281000	151000	282000	232000	0.0123182	1.0091	0.0130759
pme1055	L-Kynurenine	Amino acid derivatives	3690	3050	5650	11700	10400	7840	1.33279	2.41646	1.2729
pme1063	Uridine	Nucleotide and its derivates	1000000	1540000	2530000	3860000	1400000	1730000	0.463637	1.3787	0.463307
pme1070	L-(-)-Tyrosine	Amino acids	162000	34900	84200	126000	100000	92100	0.448699	1.13163	0.178397
pme1090	Glutathione reduced form	Amino acid derivatives	9	9	91800	34200	45100	31500	2.71977	1.20674	0.271109
pme1097	Adenine	Nucleotide and its derivates	149000	194000	39000	503000	183000	366000	1.31607	2.75393	1.46149
pme1104	L-Isoleucine	Amino acids	19200	10800	12400	22300	20700	15100	0.670455	1.37028	0.454474
pme1107	Guanine	Nucleotide and its derivates	2130	9	9	1360	9	6140	1.25246	3.49581	1.80563
pme1115	Inosine	Nucleotide and its derivates	57900	47500	48000	47000	47700	50300	0.203955	0.945241	-0.0812456
pme1162	Gallic acid	Benzoic acid derivatives	779000	355000	1260000	673000	672000	222000	0.579202	0.654553	-0.611418
pme1175	Guanosine	Nucleotide and its derivates	3860000	5650000	11400000	12800000	5010000	6880000	0.305339	1.18077	0.239734
pme1181	Deoxyguanosine	Nucleotide and its derivates	35400	23500	48100	44600	28900	53500	0.352255	1.18692	0.247218
pme1187	5-Methyluridine	Nucleotide and its derivates	6650	12200	16500	15600	15400	12900	0.527134	1.24187	0.312511
pme1194	Deoxycytidine	Nucleotide and its derivates	59000	39800	62000	9	9	9	4.35217	0.00016791	-12.54
pme1201	Phloretin	Flavanone	13300000	638000	1790000	504000	7400000	4250000	0.0117182	0.772762	-0.371904
pme1210	L-Methionine	Amino acids	84900	47800	145000	176000	72400	177000	0.669045	1.53187	0.615293
pme1218	2-Picolinic acid	Organic acids	271000	9	367000	105000	232000	216000	1.5529	0.866759	-0.206297
pme1225	5-Hydroxy-L-tryptophan	Amino acid derivatives	1860	304	2300	7710	1030	9	0.689221	1.9599	0.970781
pme1239	S-(methyl)glutathione	Amino acid derivatives	9	3520	9	4410	4480	6000	2.63154	4.20859	2.07334
pme1283	S-(5'-Adenosy)-L-homocysteine	Amino acid derivatives	142000	167000	271000	299000	242000	290000	0.773253	1.43276	0.518796
pme1292	Homogentisic acid	Organic acids	539000	646000	760000	577000	954000	403000	0.119336	0.994344	-0.00818236
pme1294	Xanthosine	Nucleotide and its derivates	617000	259000	1780000	225000	435000	677000	0.612845	0.503389	-0.990256
pme1310	N'-Formylkynurenine	Amino acid derivatives	3460	5690	7240	7410	6550	8300	0.676986	1.35815	0.441638
pme1346	8-Hydroxyguanosine	Nucleotide and its derivates	416000	311000	436000	397000	355000	408000	0.0199832	0.99742	-0.00372629
pme1368	L-Pipecolic acid	Amino acid derivatives	11000	12300	38800	31300	12600	9	1.50002	0.707069	-0.500077
pme1377	1-Methyladenosine	Nucleotide and its derivates	13200	16700	16100	41800	14300	13700	0.462949	1.51739	0.601593
pme1383	Pyridoxine	Vitamins	15300000	10700000	14000000	11400000	21700000	13800000	0.288958	1.1725	0.229588
pme1397	Pelargonidin	Anthocyanins	469000	103000	287000	83300	454000	327000	0.0495813	1.00617	0.00887403
pme1398	Delphinidin 3-O-glucoside (Mirtillin)	Anthocyanins	13700000	20600000	16600000	21500000	25400000	18600000	0.607861	1.28684	0.363829
pme1399	Xanthohumol	Flavanone	15100	12800	19000	29000	31900	23600	1.07976	1.80171	0.849363
pme1408	L-Glutamine	Amino acids	49700	75700	98300	499000	84600	162000	1.18454	3.33304	1.73684
pme1417	L-Tryptamine	Tryptamine derivatives	6530000	130000	10900000	373000	404000	914000	1.16263	0.0962984	-3.37634
pme1419	L-Methionine methyl ester	Amino acid derivatives	9	9	49900	9	9	9	1.67601	0.000540887	-10.8524
pme1423	Hydrocinnamic acid	Hydroxycinnamoyl derivatives	30800	9	27300	25900	76300	9	0.147239	1.75892	0.814689
pme1424	Coniferylaldehyde	Hydroxycinnamoyl derivatives	1760000	2250000	1640000	1460000	1150000	1110000	0.878934	0.658407	-0.602948
pme1434	Syringin	Hydroxycinnamoyl derivatives	147000	72900	135000	191000	117000	80200	0.12855	1.09383	0.129388
pme1436	p-Coumaric acid	Hydroxycinnamoyl derivatives	1420000	29100	324000	352000	3110000	1430000	1.34257	2.75901	1.46415
pme1473	5'-Deoxy-5'-(methylthio)adenosine	Nucleotide and its derivates	818	133000	20700	88400	5700	14400	0.31429	0.702184	-0.51008
pme1478	Myricetin	Flavonol	601000	57500	110000	118000	617000	109000	0.267193	1.09824	0.135198
pme1500	Kumatakenin	Flavonol	38400	2620000	427000	43000	3380	208000	1.74374	0.0824464	-3.6004
pme1510	Baicalein (5,6,7-Trihydroxyflavone)	Flavone	412000	988000	832000	1530000	1210000	1250000	1.02894	1.78763	0.838052
pme1514	Epigallocatechin (EGC)	Catechin derivatives	167000	150000	199000	618000	109000	47500	0.176232	1.50097	0.585894
pme1518	Nobiletin	Flavone	199000	489000	382000	496000	307000	377000	0.272473	1.1028	0.141176
pme1521	Dihydroquercetin (Taxifolin)	Flavonol	611000	433000	448000	408000	863000	1200000	0.70119	1.65617	0.727847
pme1535	(+)-Gallocatechin (GC)	Catechin derivatives	54700000	21300000	54200000	9950000	35100000	14800000	1.09095	0.459677	-1.12131
pme1544	Acacetin	Flavone	81900	54600	60200	4670	53400	26400	1.32113	0.429436	-1.21949
pme1550	Tangeretin	Flavone	99600	248000	197000	248000	146000	140000	0.0254214	0.980536	-0.0283572
pme1551	Myricetin 3-O-rhamnoside (Myricitrin)	Flavonol	620000	286000	338000	172000	196000	108000	1.31278	0.382637	-1.38595
pme1562	Epicatechin gallate (ECG)	Catechin derivatives	55400	15400	29400	15900	9	4940	2.12929	0.208074	-2.26483
pme1568	Orobol (5,7,3',4'-tetrahydroxyisoflavone)	Isoflavone	79700	47900	77100	42300	79100	71400	0.144411	0.941866	-0.0864061
pme1580	Eriodictyol	Flavanone	4320000	864000	2670000	1280000	2430000	2900000	0.0480349	0.841609	-0.248777
pme1588	Isorhamnetin	Flavonol	17100	9140	105000	12700	8530	7110	1.11837	0.21594	-2.2113
pme1598	Hesperetin 5-O-glucoside	Flavanone	5760000	999000	1730000	4530000	3850000	6110000	1.01299	1.70691	0.771391
pme1599	7-O-Methyleriodictyol	Flavanone	5320000	1390000	2370000	6210000	741000	764000	0.606904	0.84967	-0.235026
pme1601	Apigenin 4-O-rhamnoside	Flavone	194000	296000	350000	155000	244000	338000	0.289855	0.877381	-0.188725
pme1605	Kaempferol 3-O-robinobioside (Biorobin)	Flavonol	247000	1010000	204000	110000	42000	48100	1.82144	0.136961	-2.86816
pme1611	Isohemiphloin	Alkaloids	12200000	2400000	4050000	3190000	6140000	4280000	0.168785	0.729759	-0.454509
pme1637	Coniferyl alcohol	Hydroxycinnamoyl derivatives	567000	504000	434000	338000	467000	214000	0.798425	0.677076	-0.562609
pme1646	Pinoresinol	Hydroxycinnamoyl derivatives	585000	532000	649000	944000	781000	448000	0.345806	1.23046	0.299203
pme1662	sakuranetin	Flavone	1120000	652000	917000	4190000	489000	152000	0.26732	1.79658	0.845252
pme1665	Isovitexin 7-O-glucoside (Saponarin)	Others	9	12500	9340	15900	9	9470	0.0523227	1.16156	0.216068
pme1682	trans-2-Hexenal	Others	597000	1390000	448000	366000	520000	459000	0.770156	0.552361	-0.856316
pme1683	D-Pantothenic dcid	Organic acids	5840	9	9	9	9	9	1.45275	0.00460908	-7.7613
pme1691	Acetylcholine	Cholines	3020000	3120000	2380000	1700000	1930000	2630000	0.705551	0.734742	-0.444691
pme1692	Inosine 5'-monophosphate	Nucleotide and its derivates	17200	10800	22500	12700	11500	12400	0.574297	0.724752	-0.46444
pme1695	Sinapic acid	Hydroxycinnamoyl derivatives	211000	649000	510000	94300	139000	110000	1.57173	0.250584	-1.99663
pme1709	Nicotinic Acid Methyl Ester (Methyl Nicotinate)	Vitamins	504000	52900	167000	103000	217000	255000	0.101389	0.794309	-0.332228
pme1711	3-Hydroxy-3-methyl butyric acid	Organic acids	464000	356000	967000	1110000	1190000	633000	0.856071	1.6413	0.714837
pme1712	L-Saccharopine	Amino acid derivatives	96000	64500	101000	43300	94700	126000	0.112908	1.00956	0.013727
pme1730	D-Erythronolactone	Organic acids	609000	1080000	1080000	549000	1180000	696000	0.287468	0.875767	-0.19138
pme1777	Cyanidin 3,5-O-diglucoside (Cyanin)	Anthocyanins	36700000	5070000	27000000	1520000	16500000	5450000	1.19825	0.341283	-1.55096
pme1793	Pelargonin	Anthocyanins	7180000	823000	4060000	230000	3080000	2050000	0.918953	0.444334	-1.17028
pme1806	Chlorogenic acid methyl ester	Quinate and its derivatives	53600	34500	86800	92600	68100	95700	0.76661	1.46598	0.551866
pme1814	2,5-dihydroxybenzoic acid (Gentisic acid)	Benzoic acid derivatives	1810000	3000000	5520000	2510000	2360000	1910000	0.557888	0.656341	-0.607483
pme1816	Neochlorogenic acid (5-O-Caffeoylquinic acid)	Quinate and its derivatives	11200000	11300000	13900000	7280000	9710000	8720000	0.804731	0.706319	-0.501609
pme1820	p–Hydroxyphenyl acetic acid	Organic acids	20400	32900	37700	51300	48300	21300	0.426049	1.32857	0.409876
pme1824	Protocatechuic acid	Catechin derivatives	3320000	4490000	8810000	4580000	5400000	4090000	0.165715	0.84657	-0.240298
pme1828	Betaine	Alkaloids	5630000	7060000	9250000	2920000	3320000	2550000	1.36011	0.400638	-1.31963
pme1830	Succinic acid	Organic acids	5320000	4130000	6660000	3870000	2700000	4610000	0.731542	0.693979	-0.527036
pme1841	1,5-Diaminopentane	Phenolamides	144000	251000	157000	108000	41700	61000	1.36012	0.381703	-1.38948
pme1846	D(+)-Glucose	Carbohydrates	4220000	5980000	6080000	3320000	4840000	5030000	0.490243	0.810197	-0.303656
pme1851	Creatine	Organic acids	537000	193000	638000	207000	255000	286000	0.761665	0.546784	-0.870958
pme1936	Creatinine	Organic acids	192000	59400	92300	48700	128000	170000	0.00253991	1.00873	0.012538
pme1944	D-Mannitol	Alcohols and polyols	206000	247000	165000	84000	141000	130000	1.00571	0.574434	-0.799788
pme1949	Riboflavin	Vitamins	30900	173000	87700	323000	65200	76100	0.497975	1.59225	0.671067
pme1966	2-Aminoethanesulfonic acid	Organic acids	238000	240000	318000	161000	190000	153000	0.938184	0.633166	-0.659345
pme1977	Suberic acid	Organic acids	54500	74100	71000	93000	115000	42600	0.281661	1.25551	0.328275
pme1988	L-Alanine	Amino acids	3310000	3080000	3220000	5600000	5420000	3650000	0.854277	1.52653	0.610261
pme2019	DL-Arabinose	Carbohydrates	1110000	1450000	1450000	799000	1340000	1240000	0.432927	0.842643	-0.247006
pme2024	serotonin	Tryptamine derivatives	40000000	4860000	23500000	1700000	7440000	3060000	1.58401	0.178467	-2.48627
pme2033	L(-)-Malic acid	Organic acids	16700000	13500000	14900000	6450000	8730000	7730000	1.19184	0.507982	-0.97715
pme2036	Quinic acid	Quinate and its derivatives	3500000	3420000	3890000	2970000	4060000	3600000	0.0779592	0.983349	-0.0242249
pme2049	2-Hydroxybutanoic acid	Organic acids	299000	127000	412000	382000	250000	228000	0.184521	1.02625	0.0373864
pme2050	Citric acid	Organic acids	38000000	27500000	34800000	32500000	16600000	21300000	0.743459	0.701894	-0.510674
pme2108	L-Carnitine	Others	352000	314000	330000	252000	179000	185000	0.986993	0.618474	-0.693215
pme2111	L-ascorbate	Vitamins	1890000	1940000	3050000	1180000	3680000	2420000	0.037048	1.05814	0.0815299
pme2122	Histamine	Amino acid derivatives	1000000	1040000	1610000	986000	1280000	1510000	0.101181	1.03452	0.0489623
pme2129	(S)-(-)-2-Hydroxyisocaproic acid	Organic acids	249000	191000	1230000	312000	672000	710000	0.400524	1.01437	0.0205858
pme2136	DL-threitol	Alcohols and polyols	69000	136000	139000	107000	84200	60800	0.536657	0.732558	-0.448985
pme2142	L-Theanine	Amino acids	29100	9600	33200	11200	13600	10700	0.86238	0.493741	-1.01817
pme2165	Orotic acid	Vitamins	1330000	711000	911000	921000	306000	479000	0.930587	0.577913	-0.791075
pme2184	Nomilin	Terpenoids	65100	65200	89400	48600	39700	89200	0.505469	0.80792	-0.307716
pme2237	Dulcitol	Alcohols and polyols	371000	562000	458000	189000	186000	270000	1.23933	0.463695	-1.10875
pme2244	3-Indolepropionic acid	Indole derivatives	51700	45200	19400	25800	47800	39300	0.0383938	0.970765	-0.0428056
pme2246	Ellagic acid	Others	396000	291000	392000	372000	560000	553000	0.680565	1.37627	0.460768
pme2253	L-Gulonic-γ-lactone	Carbohydrates	2420000	3150000	3110000	1090000	3600000	2430000	0.507694	0.820276	-0.285818
pme2256	D-Arabitol	Alcohols and polyols	59700	42900	93100	29600	49500	38700	0.83455	0.601942	-0.732304
pme2263	Biotin	Vitamins	7720	5010	17900	10700	11300	12500	0.430718	1.12635	0.171651
pme2268	Trigonelline	Alkaloids	23000000	33800000	51700000	12400000	25400000	30000000	0.768055	0.624885	-0.678338
pme2278	Guanosine monophosphate	Nucleotide and its derivates	22800	19700	36700	35600	9	11200	1.70567	0.591023	-0.758714
pme2289	Vitamin A	Vitamins	34400	65600	92000	77700	62800	68500	0.300486	1.08854	0.122397
pme2292	Putrescine	Phenolamides	63400	65300	205000	60200	81200	90000	0.353815	0.693437	-0.528163
pme2296	Curcumin	Others	48800	57300	49500	44000	25900	39600	0.776126	0.703728	-0.506911
pme2319	Hesperetin	Flavanone	18200	9990	21600	37300	12400	7810	0.0401297	1.15505	0.207957
pme2366	Phenethylamine	Others	14700000	2300000	51200000	29400000	14000000	16800000	0.493263	0.882698	-0.180008
pme2380	A-Ketoglutaric acid	Organic acids	408000	832000	531000	1710000	1160000	1150000	1.26471	2.2699	1.18263
pme2427	N-Acetyl-L-tyrosine	Amino acid derivatives	15600	18600	19200	28100	28500	19100	0.744952	1.4176	0.503454
pme2433	Diethanolamine	Others	93700	42900	93300	126000	124000	163000	1.02857	1.79643	0.845135
pme2435	L-Fucose	Carbohydrates	1390000	1020000	761000	595000	2070000	1260000	0.197319	1.23778	0.307755
pme2459	Luteolin 7-O-glucoside (Cynaroside)	Flavone	27600000	24300000	45500000	70800000	160000000	271000000	1.70942	5.15195	2.36512
pme2478	Protocatechuic aldehyde	Catechin derivatives	531000	604000	646000	986000	590000	673000	0.501994	1.26277	0.336596
pme2491	Kaempferol 3,7-dirhamnoside (Kaempferitrin)	Flavonol	69800	18600	41400	7980	38800	48700	0.523443	0.735593	-0.44302
pme2527	L(+)-Ornithine	Amino acids	9	34300	92200	169000	48400	48700	1.81597	2.10341	1.07273
pme2541	α-Hydroxyisobutyric acid	Organic acids	78200	41300	85800	87900	58500	52400	0.0184566	0.968339	-0.0464159
pme2550	Cis-Aconitic acid	Organic acids	190000	75600	383000	55500	128000	77100	0.994985	0.401788	-1.31549
pme2559	N-Acetylaspartate	Amino acid derivatives	18400	38800	47600	49600	41200	37100	0.487295	1.22042	0.287378
pme2566	(5-L-Glutamyl)-L-amino acid	Amino acid derivatives	410000	738000	349000	440000	58700	274000	1.05732	0.516166	-0.954094
pme2594	4-Pyridoxic acid	Pyridine derivatives	2150000	2220000	1840000	2130000	2100000	1640000	0.191889	0.94525	-0.0812328
pme2598	3,4-Dihydroxybenzeneacetic acid	Organic acids	366000	255000	206000	265000	242000	244000	0.172128	0.908102	-0.139074
pme2601	3-Hydroxypropanoic acid	Organic acids	260000	376000	227000	359000	467000	302000	0.585904	1.30707	0.386335
pme2603	3-Hydroxyanthranilic acid	Organic acids	103000	164000	157000	147000	97900	91700	0.496513	0.793868	-0.333029
pme2607	5-Hydroxyindole-3-acetic acid	Indole derivatives	113000	204000	151000	370000	147000	160000	0.523616	1.44658	0.532647
pme2617	Methionine sulfoxide	Amino acid derivatives	1060000	700000	668000	546000	704000	802000	0.36897	0.84514	-0.242738
pme2634	Dl-Norvaline	Amino acids	23500000	16100000	24600000	24600000	25800000	25400000	0.473523	1.18069	0.239625
pme2636	Enterodiol	Alcohols and polyols	34800	38400	30100	54800	55800	49000	0.947366	1.54501	0.62762
pme2651	NADP	Others	200000	498000	518000	345000	445000	306000	0.0571188	0.901316	-0.149895
pme2661	Vitamin D3	Vitamins	3640	9420	9270	14200	12100	4980	0.496716	1.40081	0.486257
pme2670	4-Hydroxybenzaldehyde	Benzoic acid derivatives	2420000	3000000	2570000	4510000	2830000	3160000	0.599846	1.31414	0.394122
pme2693	N-Acetylputrescine	Phenolamides	1310000	1050000	3830000	224000	1280000	2440000	0.748811	0.637157	-0.65028
pme2702	4-Acetamidobutyric acid	Organic acids	247000	158000	268000	105000	137000	77700	1.17659	0.475037	-1.07389
pme2706	2,3-Dihydroxybenzoic acid	Organic acids	3470000	4690000	8610000	4660000	5380000	3880000	0.236558	0.830054	-0.268723
pme2709	2-Hydroxy-2-methyl butyric acid	Organic acids	2190	2680	3540	9030	2100	3070	0.514253	1.68847	0.755713
pme2720	Indole-3-carboxaldehyde	Indole derivatives	692000	19900	26100	22900	16200	11300	1.32259	0.0682927	-3.87213
pme2735	S-(5'-Adenosyl)-L-methionine	Amino acid derivatives	2010000	2220000	6650000	1120000	1590000	3300000	0.749347	0.55239	-0.856242
pme2740	N-Phenylacetylglycine	Amino acid derivatives	11700	4000	11100	9150	5120	8980	0.115757	0.867537	-0.205002
pme2746	Flavin adenine dinucleotide (FAD)	Nucleotide and its derivates	134000	761000	990000	947000	223000	298000	0.18634	0.77878	-0.360713
pme2755	N-Acetyl-D-glucosamine	Carbohydrates	13300000	15500000	16100000	13000000	10900000	9870000	0.719515	0.752116	-0.410973
pme2761	4-Hydroxy-2-oxoglutaric acid	Organic acids	451000	624000	399000	347000	493000	724000	0.0682746	1.06106	0.085504
pme2776	2'-Deoxyinosine	Nucleotide and its derivates	109000	126000	252000	157000	150000	130000	0.0830601	0.897331	-0.156288
pme2786	N-Acetyl-5-hydroxytryptamine	Tryptamine derivatives	744000	192000	373000	505000	589000	420000	0.453481	1.15661	0.2099
pme2798	7-Methylxanthine	Nucleotide and its derivates	76900	124000	48400	100000	118000	63500	0.289801	1.12916	0.175252
pme2819	All-trans-13,14-dihydroretinol	Vitamins	227000	362000	424000	9	310000	308000	1.8722	0.610078	-0.712934
pme2827	Palmitaldehyde	Lipids_Fatty acids	1420000	1440000	1490000	2150000	1380000	1890000	0.521001	1.24598	0.317277
pme2830	O-Phosphorylethanolamine	Others	31400	35000	50300	19500	15900	26200	1.08511	0.527849	-0.921802
pme2836	5-Hydroxytryptophol	Indole derivatives	338000	425000	396000	265000	340000	557000	0.0908692	1.00259	0.0037295
pme2884	Guanidinoethyl sulfonate	Organic acids	58000	47600	45400	27100	29200	32300	1.04679	0.586755	-0.76917
pme2890	L-Homocystine	Amino acids	28500	28600	16600	24000	21600	20100	0.20709	0.891452	-0.165771
pme2895	Dihydromyricetin	Flavonol	78300	30200	125000	44600	97600	54000	0.116279	0.840257	-0.251098
pme2901	1-O-Caffeoyl quinic acid	Quinate and its derivatives	11400000	11400000	13500000	7240000	10300000	8180000	0.800393	0.70854	-0.497079
pme2903	4-Hydroxybenzoic acid	Organic acids	9860000	7980000	19700000	16000000	30100000	16200000	0.851218	1.65956	0.730804
pme2950	Hesperetin 7-rutinoside (Hesperidin)	Flavanone	643000	891000	568000	1280000	1310000	1320000	1.13449	1.86013	0.895406
pme2957	Naringenin chalcone	Flavanone	8820000	2160000	9460000	7550000	8730000	9660000	0.603656	1.26908	0.343783
pme2963	Aromadedrin (Dihydrokaempferol)	Flavonol	6640000	3870000	6420000	7530000	6810000	7620000	0.627873	1.29711	0.375296
pme2973	Icariin (kaempferol 3,7-O-diglucoside 8-prenyl derivative)	Flavonol	1880000	3220000	2940000	2250000	2360000	1280000	0.609377	0.732587	-0.448928
pme2977	Troxerutin (Trihydroxyethyl rutin)	Flavonol	3990	205000	38600	1620	8770	5650	1.6475	0.0647845	-3.94821
pme2979	Pinocembrin (Dihydrochrysin)	Flavanone	153000	53200	183000	260000	281000	358000	1.26649	2.30987	1.20781
pme2984	Isosakuranetin-7-neohesperidoside (Poncirin)	Flavanone	90600	12400	30800	506000	59800	59500	1.29713	4.67339	2.22447
pme2988	3,4-Dihydrocoumarin	Coumarins	9	52300	9	123000	9	9	0.146787	2.35135	1.23349
pme2996	4-Hydroxycoumarin	Coumarins	671000	349000	404000	527000	652000	526000	0.463119	1.19733	0.259823
pme3007	Uridine 5’-diphosphate	Nucleotide and its derivates	40200	47100	75800	52200	49500	40700	0.235741	0.873084	-0.195808
pme3011	γ-aminobutyric acid	Organic acids	1420000	2010000	1900000	7250000	875000	1360000	0.201043	1.77955	0.831512
pme3017	2-Aminoisobutyric acid	Amino acid derivatives	2660000	2310000	3660000	1860000	2420000	2820000	0.439418	0.822711	-0.281542
pme3033	N,N-Dimethylglycine	Amino acid derivatives	2540000	2680000	2860000	5500000	2170000	2130000	0.16558	1.21287	0.278426
pme3034	ethylmalonate	Organic acids	30500	10300	66000	19800	11000	21100	0.661214	0.485955	-1.04111
pme3038	5-oxoproline	Amino acid derivatives	394000	104000	3080000	1230000	486000	1360000	0.623841	0.859698	-0.218098
pme3069	Taurocholic acid	Organic acids	8080000	8090000	7990000	9280000	7690000	7240000	0.0135218	1.00207	0.00298262
pme3081	4-(Aminomethyl)-5-(hydroxymethyl)-2-methylpyridin-3-ol	Others	53600	29100	78200	85400	75400	66100	0.722428	1.41019	0.495892
pme3083	2-(Formylamino)benzoic acid	Organic acids	7490000	212000	1950000	1890000	16100000	8120000	1.27956	2.70514	1.4357
pme3096	Aminomalonic acid	Organic acids	4800000	2740000	6280000	3040000	3410000	3880000	0.473033	0.747467	-0.419917
pme3104	1-Methyladenine	Nucleotide and its derivates	75600	152000	84800	61100	150000	182000	0.29223	1.25832	0.331502
pme3123	Sinapyl alcohol	Hydroxycinnamoyl derivatives	100000	115000	93900	89700	77300	43600	0.795125	0.681774	-0.552634
pme3129	Quercetin 4'-O-glucoside (Spiraeoside)	Flavonol	4270000	817000	1350000	3570000	3000000	4940000	1.0448	1.7881	0.838427
pme3134	3-Hydroxyflavone	Flavonol	7570	25800	10500	8910	12600	8950	0.392148	0.694324	-0.526319
pme3140	6-Hydroxy-4-methylcoumarin	Coumarins	664000	1540000	1850000	653000	682000	876000	0.84761	0.545387	-0.874647
pme3146	Ureidoisobutyric acid	Organic acids	17600	8170	10000	7230	6480	9	1.75804	0.383534	-1.38257
pme3148	L-Palmitoylcarnitine	Others	39800	40000	20000	9740	28600	27300	0.718358	0.657715	-0.604465
pme3151	Deoxyribose 5-phosphate	Nucleotide and its derivates	125000	149000	357000	35700	309000	134000	0.606508	0.758637	-0.398518
pme3160	D-Glucose 6-phosphate	Carbohydrates	2520000	3580000	3730000	3980000	3300000	2430000	0.0422819	0.987792	-0.0177201
pme3163	D-Sedoheptuiose 7-phosphate	Carbohydrates	14000000	16300000	14600000	2180000	9020000	18100000	0.914164	0.652561	-0.615815
pme3174	Cytidine 5'-monophosphate (Cytidylic acid)	Nucleotide and its derivates	188000	180000	202000	157000	95500	147000	0.792593	0.700877	-0.512766
pme3184	2'-Deoxyadenosine-5'-monophosphate	Nucleotide and its derivates	5650000	4540000	6130000	4600000	7020000	5460000	0.100992	1.04657	0.0656669
pme3188	Uridine 5'-monophosphate	Nucleotide and its derivates	96700	121000	229000	276000	52500	93200	0.316881	0.944034	-0.0830892
pme3194	N-acetylglycine	Amino acid derivatives	7570000	11300000	11500000	3230000	5360000	4690000	1.27748	0.437274	-1.19339
pme3200	1-methylguanidine	Nucleotide and its derivates	78200	92800	62700	100000	78400	89700	0.389679	1.1472	0.198113
pme3207	trans,trans-Muconic acid	Organic acids	104000	53900	11600	49700	630000	79300	1.16473	4.47788	2.16281
pme3210	Genistein 7-O-Glucoside (Genistin)	Isoflavone	2000000	1490000	1030000	1830000	919000	1010000	0.372579	0.831637	-0.265974
pme3211	Quercetin 3-O-glucoside (Isotrifoliin)	Flavonol	4230000	802000	1420000	3540000	3050000	4550000	1.0165	1.7266	0.787931
pme3227	Vitexin 2''-O-beta-L-rhamnoside	Flavone C-glycosides	918000	222000	473000	75200	537000	641000	0.504222	0.776937	-0.36413
pme3230	Calycosin	Isoflavone	9	13500	9	9	15500	16200	1.37959	2.34569	1.23001
pme3245	Medicarpin	Hydroxycinnamoyl derivatives	10300	6230	13900	7470	11900	19700	0.380145	1.28393	0.360567
pme3246	Coniferin	Hydroxycinnamoyl derivatives	98700000	1270000	34100000	39100000	88500000	125000000	1.28789	1.88409	0.913868
pme3250	Biochanin A	Isoflavone	9290	85600	15600	9	9	50400	2.64424	0.456313	-1.13191
pme3261	6-Hydroxydaidzein	Isoflavone	142000	136000	132000	147000	182000	194000	0.646506	1.27561	0.351187
pme3267	Kaempferol 3-O-galactoside (Trifolin)	Flavonol	109000	103000	96800	194000	409000	877000	1.60087	4.79275	2.26085
pme3276	2'-Hydroxygenistein	Isoflavone	87300	38000	77900	36500	71800	60100	0.296811	0.82874	-0.271008
pme3282	Afzelechin (3,5,7,4'-Tetrahydroxyflavan)	Flavanone	56900	9	9	24100	9	9	0.149554	0.423732	-1.23877
pme3288	3,7-Di-O-methylquercetin	Flavonol	1100000	128000	918000	179000	82200	56300	1.6483	0.14795	-2.75682
pme3292	Prunetin	Isoflavone	4980	95800	10500	4680	3560	59700	0.494079	0.610532	-0.711861
pme3296	Kaempferol 3-O-rhamnoside (Kaempferin)	Flavonol	1080000	1720000	652000	1260000	1070000	1090000	0.126233	0.99073	-0.0134361
pme3300	Tricetin	Flavone	383000	55400	110000	9	160000	56700	1.89005	0.395166	-1.33947
pme3309	2-Methylglutaric acid	Organic acids	254000	168000	285000	238000	171000	174000	0.407983	0.824611	-0.278214
pme3313	D-Fructose 6-phosphate	Carbohydrates	2050000	2870000	2250000	2030000	2630000	1960000	0.217823	0.923291	-0.115142
pme3333	1,4-dihydro-1-Methyl-4-oxo-3-pyridinecarboxamide	Pyridine derivatives	388000	543000	931000	819000	410000	592000	0.00905526	0.977981	-0.0321222
pme3336	N6-Succinyl Adenosine	Nucleotide and its derivates	1990000	4730000	4420000	3650000	2490000	1630000	0.567702	0.697487	-0.519763
pme3346	5-hydroxyhexanoic acid	Organic acids	305000	202000	216000	727000	309000	93400	0.202342	1.5621	0.643489
pme3349	8-Hydroxy-2-deoxyguanosine	Nucleotide and its derivates	6710	6620	11600	16800	7420	8330	0.421808	1.30566	0.384775
pme3351	Allysine(6-Oxo DL-Norleucine)	Amino acid derivatives	247000	204000	315000	319000	407000	314000	0.703117	1.3577	0.441167
pme3367	6-MethylCoumarin	Coumarins	80100	66900	157000	169000	109000	160000	0.727806	1.44079	0.52686
pme3369	Rhamnetin (7-O-methxyl quercetin)	Flavonol	48400	27500	7780	78100	29700	5200	0.0539807	1.35038	0.433368
pme3382	N-Acetylthreonine	Amino acid derivatives	156000	151000	231000	180000	184000	155000	0.0532032	0.964684	-0.0518716
pme3387	H-HomoArg-OH	Amino acid derivatives	33700	28000	49400	61500	46100	42900	0.660337	1.35464	0.437905
pme3396	Fustin	Flavonol	1910000	351000	1020000	279000	1600000	1320000	0.0615907	0.975008	-0.0365146
pme3400	Sissotrin	Isoflavone	9	246000	9	9	9	91300	0.158381	0.371184	-1.42979
pme3401	Syringetin	Flavonol	163000	281000	1120000	241000	207000	153000	0.811603	0.384271	-1.3798
pme3410	Laricitrin	Flavonol	31000	25400	72700	36900	32900	26100	0.347441	0.742835	-0.428886
pme3416	Esculetin (6,7-dihydroxycoumarin)	Coumarins	13000000	4350000	20300000	13300000	33500000	32100000	1.05673	2.09562	1.06738
pme3422	6-Methoxy-7,8-DihydroxyCoumarin	Coumarins	45700	59500	179000	60100	27200	29900	1.01673	0.412386	-1.27793
pme3428	Esculin (6,7-Dihydroxycoumarin-6-glucoside)	Coumarins	16400000	17300000	9160000	11400000	14400000	15500000	0.0156392	0.963602	-0.0534901
pme3434	Eudesmic acid (3,4,5-trimethoxybenzoic acid)	Benzoic acid derivatives	11600	25100	39400	10700	21500	12700	0.693798	0.590013	-0.761181
pme3439	Butein	Flavanone	7860	2740	8210	4970	5830	5990	0.011176	0.89261	-0.163898
pme3442	Quercetin 7-O-β-D-Glucuronide	Flavonol	14200000	11500000	16100000	14700000	20500000	21400000	0.674298	1.35407	0.437299
pme3443	Sinapinaldehyde	Hydroxycinnamoyl derivatives	557000	1100000	953000	809000	499000	793000	0.395438	0.804981	-0.312974
pme3451	Rotenone	Isoflavone	384000	262000	122000	123000	238000	250000	0.279654	0.795573	-0.329934
pme3453	p-Coumaraldehyde	Hydroxycinnamoyl derivatives	10300	9	9	6660	8890	6270	2.5336	2.11475	1.08049
pme3459	Caffeyl alcohol	Hydroxycinnamoyl derivatives	13500000	14700000	14100000	9490000	8750000	2410000	1.16286	0.48818	-1.03452
pme3461	Homoeriodictyol	Flavanone	93100	23600	30800	109000	36100	26900	0.201005	1.1661	0.221694
pme3464	Isosakuranetin (4'-Methylnaringenin)	Flavanone	16400	12800	16700	44200	8250	7880	0.0904174	1.31438	0.394381
pme3469	Kaempferol-3-O-robinoside-7-O-rhamnoside (Robinin)	Flavonol	1000000	730000	1170000	280000	1890000	1710000	0.0239585	1.33793	0.420004
pme3473	Butin	Flavone	9220000	2050000	9520000	7670000	9110000	10000000	0.631087	1.28812	0.365266
pme3478	Pantetheine	Vitamins	44000	26300	66400	36100	62700	48800	0.22346	1.07974	0.110679
pme3484	Myricetin 3-O-galactoside	Flavonol	17300000	2080000	12900000	10800000	36900000	35600000	1.21329	2.58055	1.36768
pme3502	Formononetin 7-O-glucoside (Ononin)	Isoflavone	451000	152000	238000	257000	388000	357000	0.450056	1.19144	0.252705
pme3509	7,4'-Dihydroxyflavone	Flavone	41400	72700	44800	48900	46200	44800	0.232613	0.880428	-0.183723
pme3514	Morin	Flavonol	8110000	977000	2400000	3430000	8260000	5640000	0.853711	1.50866	0.59327
pme3553	Psoralen	Coumarins	99600	45500	65700	61100	100000	114000	0.51682	1.30503	0.384081
pme3564	Daphnetin	Coumarins	3560000	6600000	5900000	9090000	6190000	7110000	0.695196	1.39415	0.479383
pme3576	Anthranilic acid	Benzoic acid derivatives	47400	36600	85300	214000	123000	36400	0.80167	2.20555	1.14114
pme3705	D-glucoronic acid	Carbohydrates	113000	104000	149000	117000	97800	62900	0.607369	0.758743	-0.398316
pme3719	D-Xylonic acid	Organic acids	23300000	38700000	28200000	24600000	29700000	22200000	0.363087	0.848115	-0.237668
pme3732	Cytidine	Nucleotide and its derivates	3950000	5930000	6050000	4360000	4390000	6440000	0.110731	0.953547	-0.0686244
pme3825	3,4-Dihydroxy-DL-phenylalanine	Amino acid derivatives	16200	8160	13300	10200	13700	11200	0.0866548	0.932023	-0.101562
pme3838	Guanosine 3',5'-cyclic monophosphate	Nucleotide and its derivates	420000	295000	388000	498000	163000	220000	0.553343	0.798731	-0.324219
pme3840	Pantothenol	Alcohols and polyols	9	39400	15100	47900	15700	9	0.0411349	1.16694	0.222736
pme3965	2-(dimethylamino)guanosine	Nucleotide and its derivates	21600	15800	65400	68200	69100	104000	1.29992	2.34728	1.23099
pme3970	β-Pseudouridine	Nucleotide and its derivates	127000	175000	305000	479000	157000	186000	0.378078	1.3542	0.437442
pme3982	Hypoxanthine-9-β-D-arabinofuranoside	Nucleotide and its derivates	760000	600000	1960000	1280000	618000	908000	0.116898	0.845181	-0.242668
